# Supplementary material for: Exploring coping strategies among caregivers of children who have survived paediatric cancer in Jordan
Source: PubMed Central journal article supplement — BMJ Paediatr Open. 2024 Apr 11;8(1):e002453. doi: 10.1136/bmjpo-2023-002453 (PMC11015291; doi:10.1136/bmjpo-2023-002453), 2024-04-11
Supplement: bmjpo-2023-002453.draft_revisions.pdf [file bmjpo-2023-002453.draft_revisions.pdf]

# BMJ Paediatrics Open

BMJ Paediatrics Open is committed to open peer review. As part of this commitment we make the peer review history of every article we publish publicly available.

When an article is published we post the peer reviewers' comments and the authors' responses online. We also post the versions of the paper that were used during peer review. These are the versions that the peer review comments apply to.

The versions of the paper that follow are the versions that were submitted during the peer review process. They are not the versions of record or the final published versions. They should not be cited or distributed as the published version of this manuscript.

BMJ Paediatrics Open is an open access journal and the full, final, typeset and author-corrected version of record of the manuscript is available on our site with no access controls, subscription charges or pay-per-view fees (<http://bmjpaedsopen.bmj.com>).

If you have any questions on BMJ Paediatrics Open's open peer review process please email [info.bmjpo@bmj.com](mailto:info.bmjpo@bmj.com)



# BMJ Paediatrics Open

## Exploring Coping Strategies among Caregivers of Children who have Survived Pediatric Cancer in Jordan

|                               |                                                                                                                                                                                                                                                                  |
|-------------------------------|------------------------------------------------------------------------------------------------------------------------------------------------------------------------------------------------------------------------------------------------------------------|
| Journal:                      | <i>BMJ Paediatrics Open</i>                                                                                                                                                                                                                                      |
| Manuscript ID                 | bmjpo-2023-002453                                                                                                                                                                                                                                                |
| Article Type:                 | Original research                                                                                                                                                                                                                                                |
| Date Submitted by the Author: | 14-Dec-2023                                                                                                                                                                                                                                                      |
| Complete List of Authors:     | Ismael, Taleb; King Hussein Cancer Center<br>Ismael, Noor; Jordan University of Science and Technology<br>Jaber, Ala'a; Jordan University of Science and Technology<br>Malkawi, Somaya; The University of Jordan<br>Al Awady, Sherin; King Hussein Cancer Center |
| Keywords:                     | Caregivers                                                                                                                                                                                                                                                       |
|                               |                                                                                                                                                                                                                                                                  |

SCHOLARONE™  
Manuscripts

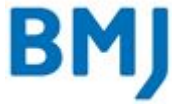

I, the Submitting Author has the right to grant and does grant on behalf of all authors of the Work (as defined in the below author licence), an exclusive licence and/or a non-exclusive licence for contributions from authors who are: i) UK Crown employees; ii) where BMJ has agreed a CC-BY licence shall apply, and/or iii) in accordance with the terms applicable for US Federal Government officers or employees acting as part of their official duties; on a worldwide, perpetual, irrevocable, royalty-free basis to BMJ Publishing Group Ltd ("BMJ") its licensees and where the relevant Journal is co-owned by BMJ to the co-owners of the Journal, to publish the Work in this journal and any other BMJ products and to exploit all rights, as set out in our [licence](#).

The Submitting Author accepts and understands that any supply made under these terms is made by BMJ to the Submitting Author unless you are acting as an employee on behalf of your employer or a postgraduate student of an affiliated institution which is paying any applicable article publishing charge ("APC") for Open Access articles. Where the Submitting Author wishes to make the Work available on an Open Access basis (and intends to pay the relevant APC), the terms of reuse of such Open Access shall be governed by a Creative Commons licence – details of these licences and which [Creative Commons](#) licence will apply to this Work are set out in our licence referred to above.

Other than as permitted in any relevant BMJ Author's Self Archiving Policies, I confirm this Work has not been accepted for publication elsewhere, is not being considered for publication elsewhere and does not duplicate material already published. I confirm all authors consent to publication of this Work and authorise the granting of this licence.

## CAREGIVER COPING AFTER PEDIATRIC CANCER

**Exploring Coping Strategies among Caregivers of Children who have Survived Pediatric  
Cancer in Jordan**

Taleb Ismael<sup>1</sup>, Noor Ismael<sup>1</sup>, Ala'a Jaber<sup>2</sup>, Somaya Malkawi<sup>3</sup>, & Sherin Al Awady<sup>4</sup>

**Authors' Note**

Taleb Ismael, MD, Consultant of Pediatric Hematology and Oncology, King Hussein Cancer Center, Amman, Jordan, [tismael@khcc.jo](mailto:tismael@khcc.jo).

Noor Ismael, PhD, MSc, OTR/L, Assistant Professor of Occupational Therapy, Jordan University of Science and Technology, Irbid, Jordan, [ntismael@just.edu.jo](mailto:ntismael@just.edu.jo).

<https://orcid.org/0000-0002-2060-4923>

Ala'a Jaber, PhD, MSc, OTR/L, Assistant Professor of Occupational Therapy, Jordan University of Science and Technology, Irbid, Jordan, [afjaber@just.edu.jo](mailto:afjaber@just.edu.jo). <https://orcid.org/0000-0001-9664-2048>

Somaya Malkawi, PhD, MSc, OTR/L, Professor of Occupational Therapy, University of Jordan, Amman, Jordan, [somamalkawi@gmail.com](mailto:somamalkawi@gmail.com).

Sherin Al Awady, RN, King Hussein Cancer Center, Amman, Jordan, [sawady@khcc.jo](mailto:sawady@khcc.jo).

1. **Joint first authorship:** Taleb Ismael, MD, King Hussein Cancer Center, & Noor Ismael, PhD, Jordan University of Science and Technology.

**Corresponding Author**

Correspondence regarding this manuscript should be addressed to the first joint author, Dr. Noor Ismael, Assistant Professor of Occupational Therapy, Department of Rehabilitation Sciences, Faculty of Applied Medical Sciences, Jordan University of Science and Technology, Irbid, Jordan, [ntismael@just.edu.jo](mailto:ntismael@just.edu.jo), <https://orcid.org/0000-0002-2060-4923>

## CAREGIVER COPING AFTER PEDIATRIC CANCER

**Statement of Contributor ship**

TI and NI researched literature and conceived the study. All authors were involved in protocol development. TI, NI and AJ were involved in gaining ethical approval, patient recruitment, and data analysis. TI and NI wrote the first draft of the manuscript. All authors reviewed and edited the manuscript and approved the final version of the manuscript.

**Acknowledgments**

The research team would like to thank caregivers who had participated in this study and shared their time experiences for the purposes of this project.

**Data Availability Statement**

Authors can share the data of this study upon reasonable request.

**Conflict of Interest Statement**

The authors of this study have no conflict of interest.

**Funding Statement**

This study received no funding.

**Research Ethics**

Institutional Review Board of King Hussein Cancer Center approved the study (Research # 17 KHCC 121).

1  
2  
3  
4  
5  
6  
7  
8  
9  
10  
11  
12  
13  
14  
15  
16  
17  
18  
19  
20  
21  
22  
23  
24  
25  
26  
27  
28  
29  
30  
31  
32  
33  
34  
35  
36  
37  
38  
39  
40  
41  
42  
43  
44  
45  
46  
47  
48  
49  
50  
51  
52  
53  
54  
55  
56  
57  
58  
59  
60

1  
2  
3  
4  
5  
6  
7  
8  
9  
10  
11  
12  
13  
14  
15  
16  
17  
18  
19  
20  
21  
22  
23  
24  
25  
26  
27  
28  
29  
30  
31  
32  
33  
34  
35  
36  
37  
38  
39  
40  
41  
42  
43  
44  
45  
46  
47  
48  
49  
50  
51  
52  
53  
54

**Exploring Coping Strategies among Caregivers of Children who have Survived Pediatric  
Cancer in Jordan**

Confidential: For Review Only

## CAREGIVER COPING AFTER PEDIATRIC CANCER

2

**Abstract**

*Objective:* To explore the coping strategies of caregivers of children who have survived pediatric cancer in Jordan. *Materials and Methods:* This study utilized a cross-sectional survey design, and convenient sampling. The sample included 102 caregivers of children who have survived cancer, and outcome measures included the Arabic-translated Brief COPE, and caregiver and child demographic and condition questionnaire. Data analyses included descriptive statistics, analysis of frequencies, and Spearman-rank order correlations. *Results:* Caregivers most frequently utilized religion coping (M= 6.42, SD= 1.85), followed by acceptance (M= 5.95, SD= 1.96) and planning (M= 5.05, SD= 1.94). The least utilized coping strategies were humor (M= 2.98, SD= 1.24) and behavioral dis-engagement as coping strategies (M= 3.01, SD= 1.42). *Conclusion:* Caregivers of children who have survived cancer in Jordan frequently utilize passive coping strategies like religion and acceptance coping to overcome daily life stressors. Caregivers might benefit from psychosocial occupational therapy interventions to support their engagement in more active or problem-focused coping strategies.

*Keywords:* cancer, neoplasms, child, caregivers, psychology, mental health



## 1 **Exploring Coping Strategies among Caregivers of Children who have Survived Pediatric** 2 **Cancer in Jordan**

3 According to the American Cancer Society (2020), cancer is the second leading cause of  
4 death in children ages one to fourteen years, after accidents. Cancer is a serious medical  
5 condition that affects not only people who have this condition, but also their surrounded families  
6 and friends (Im Song, Shin, Choi, Kang, Baik, Mo, & Kim, 2011). After surviving the cancer  
7 condition, many children and caregivers deal with residual physical (Ness, et al., 2009),  
8 cognitive (Bonner, Hardy, Willard, & Gururangan, 2009) and/or psychosocial challenges that  
9 may affect their daily life functioning (Li, Lopez, Chung, Ho, & Chiu, 2013). A number of  
10 studies have investigated caregiver coping during pediatric cancer treatments (e.g., Gage-  
11 Bouchard, Devine, & Heckler, 2013; Kohlsdorf, & Costa Junior, 2011). However, limited  
12 evidence investigated how caregivers cope after surviving the cancer condition. To authors'  
13 knowledge, there were no studies in this area in Jordan or the Arab world. Therefore, this study  
14 aimed to explore the coping strategies of caregivers of children who have survived cancer in  
15 Jordan.

### 16 **Literature Review**

17 Caregivers of children who have cancer experience elevated stress levels as compared to  
18 other medical and/or educational childhood conditions (Pinquart, 2018). There are several  
19 cancer-related factors that contribute to caregivers' stress including disruption in everyday  
20 routine changes, and participation restrictions while being on the cancer treatment (Litzelman,  
21 Catrine, Gangnon, & Witt, 2011). The nature of the cancer condition, and invasive procedures  
22 (e.g., lumbar punctures, bone marrow aspirations) associated with cancer treatments also  
23 contribute to caregiver stress and poor quality of life (Vrettos, et al., 2012). While stress is

## CAREGIVER COPING AFTER PEDIATRIC CANCER

4

1 greater in caregivers of recently diagnosed individuals, it continues to affect caregivers during  
2 treatment and even after cancer recovery (Üzar-Özçetin, & Dursun, 2020). There is accumulating  
3 evidence that looked at caregivers' negative psychological states like stress, anxiety, or  
4 depression (e.g., Fladeboe, et. al., 2018; Pierce, Hocking, Schwartz, Alderfer, Kazak, & Barakat,  
5 2017); however, there is little evidence on how caregivers' of children with or who have  
6 survived cancer cope with these states. Ways of coping influence people's adaptations to various  
7 conditions (Biggs, Brough, & Drummond, 2017), and contribute to their health and wellbeing  
8 (Kirby, et. al., 2021).

9 Coping refers to the thoughts and actions people use to manage stressful situations  
10 (Carver & Connor-Smith, 2010). Coping strategies are highly individualized because of people's  
11 differences in resources, experiences, motivation, preferences, and skills for coping. The early  
12 work of Carver and Scheier (1989) characterized people's coping into several different coping  
13 strategies, including planning, use of emotional support, and denial. Researchers differ in how  
14 they classify different coping strategies, like problem-focused or emotion-focused (Lazarus &  
15 Folkman, 1984); and adaptive or maladaptive coping (O'Brien, & Moorey, 2010). Engaging in  
16 adaptive or problem-focused coping strategies like planning or active coping contribute to better  
17 caregiver psychosocial and physical health, and quality of life (Mayordomo, Viguier, Sales,  
18 Satorres, & Meléndez, 2016). On the other hand, mal-adaptive coping strategies like substance  
19 use negatively affect the health and quality of life of caregivers and surrounding family members  
20 (Knowles, Apputhurai, O'Brien, Ski, Thompson, & Castle, 2020).

21 Unlike stress in caregivers of children with cancer, caregivers' coping strategies were  
22 scarcely studied in the literature. A study in 2013 by Gage-Bouchard, Devine and Heckler,  
23 investigated caregiver coping strategies in families of children with cancer, and found

1 associations between caregiver coping and a number of socio-demographical factors. For  
2 example, Mothers utilized active coping, instrumental support, religious coping, and emotional  
3 support, more than fathers. Also, gender and educational levels were linked to certain  
4 maladaptive coping strategies like substance use (Gage-Bouchard, 2013). While this later study  
5 investigated potential factors that affect caregiver coping during pediatric cancer, evidence on  
6 caregiver coping after surviving pediatric cancer remains understood. A relatively recent study of  
7 caregivers of lung and colorectal cancer survivors (Litzelman, Kent, & Rowland, 2018), found  
8 that caregivers engaged in emotion-focused coping (i.e., religion, acceptance, positive re-  
9 framing, and emotional support) more than problem focused coping. Care recipients in this study  
10 were adult cancer survivors not children.

11 Research in this area is needed to build on the evidence about caregivers coping during  
12 and after surviving pediatric cancer. The novelty in this study is to investigate what coping  
13 strategies caregivers of children who have survived cancer utilized to overcome daily life  
14 challenges. Up to authors' knowledge, there were no studies about caregivers' coping in Jordan.  
15 We hypothesized –since children have survived the cancer condition- that caregivers will utilize  
16 more problem-focused coping strategies to overcome daily life challenges. Characterizing  
17 caregiver coping strategies is important to investigate intervention strategies that promote the  
18 selection of adaptive or problem-focused coping strategies, and therefore, enhance caregivers'  
19 psychosocial health.

## 20 **Materials and Methods**

### 21 **Design**

22 This study utilized a cross-sectional survey design to explore the coping strategies of  
23 caregivers of children who have survived pediatric cancer.

## 1 **Participants and Settings**

2           The study recruited caregivers of children who have survived cancer through the pediatric  
3 quality of life clinic at XXX in Jordan. Care-providers in this clinic (pediatric oncologist and  
4 specialized oncology nurses) follow-up yearly with children and their caregivers in relation to  
5 child and family health and quality of life after surviving the cancer condition. Eligibility criteria  
6 for caregivers to participate in this study included: (a) Caregivers of children who have survived  
7 cancer, (b) children were clients in the pediatric survivors' clinic at XXX, (c) children were off  
8 cancer treatment for at least two years, and (d) caregiver who can read and write in Arabic in  
9 order to complete the study survey. The study excluded caregivers who did not meet the  
10 inclusion criteria mentioned above.

11           One hundred and two caregivers participated in this study and completed the study  
12 survey. Around 63% of the caregivers were mothers, 83% were married, only 18 % had a  
13 Bachelor degree, and almost half of them were un-employed (see Table 1 for demographic  
14 characteristics of the caregivers and their children). Around half of the children who have  
15 survived cancer were males, (43%) survived Leukemia, 35% had current health problems, and  
16 56% did not receive rehabilitative services (occupational therapy, physical therapy, special  
17 education, and\ or speech and language services) (see Table 2 for cancer diagnoses).

## 18 **Instruments**

### 19 ***The Brief COPE (Carver et al., 1989)***

20           It is a shorter version of the COPE Inventory, and measures individuals' ways of coping  
21 in different life situations. The Brief COPE consists of fourteen coping sub-scales with two items  
22 in each (28 items in total): *Self-distraction* (e.g., I've been turning to work or other activities to  
23 take my mind off things); *Active coping* (e.g., I've been concentrating my efforts on doing

## CAREGIVER COPING AFTER PEDIATRIC CANCER

7

1 something about the situation I'm in); *Denial* (e.g. I've been saying to myself "this isn't real);  
2  
3  
4 1  
5 2  
6 3  
7 4  
8 5  
9 6  
10 7  
11 8  
12 9  
13 10  
14 11  
15 12  
16 13  
17 14  
18 15  
19 16  
20 17  
21 18  
22 19  
23 20  
24 21  
25 22  
26 23  
27 24  
28 25  
29 26  
30 27  
31 28  
32 29  
33 30  
34 31  
35 32  
36 33  
37 34  
38 35  
39 36  
40 37  
41 38  
42 39  
43 40  
44 41  
45 42  
46 43  
47 44  
48 45  
49 46  
50 47  
51 48  
52 49  
53 50  
54 51  
55 52  
56 53  
57 54  
58 55  
59 56  
60 57

1 something about the situation I'm in); *Denial* (e.g. I've been saying to myself "this isn't real);  
2  
3  
4 1  
5 2  
6 3  
7 4  
8 5  
9 6  
10 7  
11 8  
12 9  
13 10  
14 11  
15 12  
16 13  
17 14  
18 15  
19 16  
20 17  
21 18  
22 19  
23 20  
24 21  
25 22  
26 23  
27 24  
28 25  
29 26  
30 27  
31 28  
32 29  
33 30  
34 31  
35 32  
36 33  
37 34  
38 35  
39 36  
40 37  
41 38  
42 39  
43 40  
44 41  
45 42  
46 43  
47 44  
48 45  
49 46  
50 47  
51 48  
52 49  
53 50  
54 51  
55 52  
56 53  
57 54  
58 55  
59 56  
60 57

11 Subscales' scores are generated by summing items for each sub-scale. Higher sub-scale  
12 scores indicate a respondent's tendency to engage in a particular coping strategy (Greer, 2007).  
13 Several studies explored the psychometric properties of Brief COPE. For example, Hagan et al.  
14 (2016), which sampled individuals newly diagnosed with incurable lung and gastrointestinal  
15 cancers and suggested that the Brief COPE had good psychometric properties among this  
16 population. Also, Nunes et al. (2021) found that the Brief COPE is a psychometrically sound  
17 instrument that shows measurement invariance across samples and good reliability.

18 Researchers in this study performed the forward-backward translation of the original  
19 English Brief COPE into the Arabic language (after obtaining permission from the primary  
20 COPE author Dr. Carver by e-mail) according to World Health Organization's recommendations  
21 for forward-backward translations of assessment tools (WHO; accessed October 2021). The  
22 second author (who knows Arabic and English very well, is a health-care professional, an expert  
23 in the terms of the Brief COPE, and studied PhD in the United States) performed the forward

1 translation of the Brief COPE from English into Arabic. An Expert panel (second and third  
2 authors) reviewed the Arabic translated Brief COPE terminology, discussed any conflicts, and  
3 agreed on the pre-final Arabic version. This expert panel took into consideration cultural  
4 adaptation, common language use, and conceptual equivalence of the scale. Then, a bilingual  
5 health-care professional (occupational therapist, had a master's degree in rehabilitation, and  
6 expert in the language of the Brief COPE), performed the backward translation of the Arabic-  
7 translated Brief COPE into English. An expert panel (second and third authors) reviewed the  
8 backward translated version, discussed conflicts in wordings, changed, and agreed on the final  
9 Arabic version.

### 10 *The Demographic and Condition Questionnaire*

11 Researchers in this study designed this questionnaire to collect child and caregiver  
12 demographic and condition information, like child age, gender, diagnosis, medical and  
13 educational services, and caregiver education and social status.

### 14 **Procedures**

15 The internal review board at XXX approved this study (approval number XXX).  
16 Researchers prepared the study survey, which consisted of the Child and Caregiver Demographic  
17 and Condition Questionnaire and the Arabic version of the Brief COPE. A registered nurse at the  
18 pediatric survivors' clinic at XXX. (Last author) initiated contact with caregivers who were  
19 waiting for their appointment and invited them to participate in this study. The nurse explained  
20 the study to caregivers, and assured them that their participation is voluntary, and that they can  
21 quit the study at any time. Caregivers who agreed to participate provided informed consent and  
22 completed the study survey. Data collection took place only at the pediatric survivors' clinic at  
23 XXX. All completed survey papers are kept in a secure place at XXX.

## 1 **Data Analyses**

2 All data analyses procedures utilized the Statistical Package for Social Science (SPSS 23;  
3 IBM, 2015). After data cleaning, normality and homogeneity of variance was inspected. Then  
4 Brief COPE sub-scales were calculated by summing items for each subscale. Considering the  
5 Likert scale used in the Brief COPE (1= Never to 4= Always), the minimum scores a participant  
6 can obtain is 2 while the maximum score is 8. Therefore, sub-scales' scores from 6-8 reflect  
7 greater coping strategy utilization (Ismael, Mische Lawson, Little, & Muqbel, 2018). Data  
8 analyses included calculating descriptive statistics (mean, median, range, and standard deviation)  
9 and analysis of frequencies of child and caregiver demographics, and the Brief COPE sub-scale  
10 scores. Spearman-Rank Order Correlation was used to explore if there were relationships  
11 between child and caregiver demographics, and caregiver utilization of certain coping strategies.  
12 This study referred to Akoglu (2018) in classifying the strengths of correlations as follows:  
13 Negligible (0 to .09), Weak (.1 to .19), Moderate (.2 to .29), Strong (.3 to .59), Very strong (.6 to  
14 .89), and Perfect (.9-1). Then Linear Regression analysis explored how significant correlates  
15 affect caregiver coping strategy utilization. The significance level was set at .05 for the  
16 correlations and regression analyses.

## 17 **Results**

18 Analysis of frequencies showed that 63.7% of caregivers of children who have survived  
19 cancer in this study were mothers, 83.3% were married, only 18.6% had a bachelor's degree,  
20 almost half of them were un-employed, and 60.8% had a monthly income under 500 JD. The  
21 most common cancer condition was acute Leukemia 43.1%, followed by Rhabdomyosarcoma  
22 (11.8%), bone tumors (10.8%), and Wilms (8.8%). Around half of the children who have  
23 survived cancer were males, and 34.3% were in elementary school grades 1-6. Around 60% of

## CAREGIVER COPING AFTER PEDIATRIC CANCER

10

1 the children had between three to five siblings, and 22.5% were first in order among their  
2 siblings (see Tables 1 and 2 for additional demographic and condition-related characteristics).  
3 Caregivers in this study mostly utilized religious coping ( $M= 6.42$ ,  $SD= 1.85$ ), followed by  
4 acceptance ( $M= 5.95$ ,  $SD= 1.96$ ) and planning ( $M= 5.05$ ,  $SD= 1.94$ ) (see Table 3). Caregivers  
5 rarely utilized humor ( $M= 2.98$ ,  $SD= 1.24$ ) and behavioral dis-engagement as coping strategies  
6 ( $M= 3.01$ ,  $SD= 1.42$ ). Out of the 102, four caregivers almost always utilize substance use as a  
7 coping strategy (see Figure 1).

8 A number caregiver and child demographics were correlated with utilizing different  
9 coping strategies. For example, caregiver educational levels were associated with self-distraction  
10 ( $r_s = -.273$ ,  $p = .006$ ), use of instrumental support ( $r_s = -.268$ ,  $p = .007$ ), and self-blame ( $r_s = -.217$ ,  
11  $p = .031$ ). In specific, elementary school education (a lower level of education) was associated  
12 with utilizing more self-distraction ( $r_s = .227$ ,  $p = .022$ ) and more self-blame ( $r_s = .248$ ,  $p =$   
13  $.012$ ), while having a bachelor's degree (a higher level of education) was associated with less  
14 self-distraction ( $r_s = -.206$ ,  $p = .038$ ). Also, having a graduate degree was associated with less use  
15 of instrumental support ( $r_s = -.249$ ,  $p = .012$ ). Besides caregiver education, having a female child  
16 was associated with utilizing more self-distraction ( $r_s = .284$ ,  $p = .004$ ), use of emotional support  
17 ( $r_s = .201$ ,  $p = .043$ ), and use of instrumental support ( $r_s = .205$ ,  $p = .038$ ). Also, having current  
18 health or educational problems in children who have survived cancer was associated with more  
19 caregiver substance use utilization ( $r_s = .245$ ,  $p = .015$ ) (see Table 4 for additional significant  
20 correlations). Linear regression showed that having a female child predicted more self-distraction  
21 utilization ( $\beta = .265$ ,  $p = .007$ ).

## 22 Discussion



## CAREGIVER COPING AFTER PEDIATRIC CANCER

11

1 This study explored coping strategies among caregivers of children who have survived  
2 cancer in Jordan and analyzed potential associations between caregiver and child demographics  
3 and the utilization of different coping strategies. More than half of the caregivers were mothers,  
4 and half of them were un-employed. Only a small percentage of the caregivers in this study had a  
5 bachelor's or a graduate educational degree. Demographical characteristics in this study will help  
6 in discussing caregiver utilization of different coping strategies in the following paragraphs.

7 Findings from this study showed that caregivers mostly utilized religious coping to  
8 overcome everyday stressors. Considering cancer as a very serious and life-threatening condition  
9 (Lee & Cho, 2017), individuals with cancer and/or their caregivers might view cancer as a  
10 hopeless condition that has no effective treatment (Rafferty, 2015). Therefore, caregivers might  
11 turn to spiritual and religious coping mechanisms as more powerful and alleviating treatment  
12 options (Lagman, Yoo, Levine, Donnell, & Lim, 2014). This finding is aligned with much  
13 previous research on individuals with cancer in the Eastern (e.g., Ahmadi, Hussin, &  
14 Mohammad, 2019; Elsheshtawy, Abo-Elez, Ashour, Farouk, & zaafarany, 2014) and Western  
15 countries (Thuné-Boyle, Stygall, Keshtgar, Davidson, & Newman, 2011). Religious coping,  
16 especially in the early stages of cancer treatment, may help caregivers in redefining potential  
17 stressors as beneficial (Ahmadi, et al., 2019), and accepting the condition and its consequences  
18 (Haghighi, 2013).

19 The novel finding from this study is that caregivers may continue to utilize religion  
20 coping even after their children's survival from the cancer condition. Closely looking at the  
21 characteristics of caregivers who frequently utilized religion, most of them were mothers and had  
22 only a school degree (66% for both). Also, almost all of them were unemployed. Given that  
23 religious coping does not involve scheduling appointments, planning treatments, and paying for

1 treatments, caregivers in this study might find it a suitable and comfortable way to overcome  
2 stress. In addition, caregivers in this study might feel thankful for their children's survival and  
3 continued their spiritual practices seeking help for residual health problems. It is important to  
4 mention here that religious coping, even if it involves engaging in spiritual activities, does not  
5 solve the actual stressor and its consequences. Therefore, there is contradicting evidence about  
6 the effect of engaging in religious coping on individuals' health and quality of life (i.e.,  
7 Haghghi, 2013; Ng, Mohamed, Sulaiman, & Zainal, 2017)

8         While not as frequent as religion, caregivers in this study also engaged in acceptance and  
9 planning coping. Considering that this study was after cancer survival, and a significant amount  
10 of time was spent dealing with cancer, utilizing acceptance coping might seem typical for this  
11 population. Acceptance is showed as a common way of coping in individuals with terminal  
12 illness, and can improve individuals' quality of life (Nipp, et al., 2016). Acceptance is also  
13 viewed as the step after denial (Kübler-Ross, & Kessler, 2009), and before searching for  
14 treatment options, and solving any related stressors. However, when individuals engage in  
15 acceptance coping, they are not actively solving their problem (Norberg, Lindblad, & Boman,  
16 2005). Therefore, it might be considered as a passive way of coping and should be utilized with  
17 more active ways like planning and active coping. Caregivers also utilized planning, but this  
18 study did not investigate if planning complemented acceptance coping. It is worth studying in the  
19 future what coping strategies do caregiver combine to form their coping profile.

20         The least utilized coping strategies by caregivers in this study were humor and behavioral  
21 dis-engagement. In looking at the definition of humor as making jokes or fun of the situation,  
22 and the definition of behavioral dis-engagement as giving up coping, it is obvious that these  
23 coping mechanisms might be more relevant to early stages of the cancer experience. After

1  
2  
3 1 battling a significant and serious disease with their beloved children, caregivers may turn into  
4  
5 2 more mature and strong individuals for their children and families. Therefore, caregivers in this  
6  
7 3 study might not find it appropriate to engage in humor, nor withdraw from this children's  
8  
9 4 condition. Instead, caregivers in this study were clients in the health and wellness clinic after  
10  
11 5 cancer and continued to be part of the condition with their children. In some research, humor and  
12  
13 6 behavioral dis-engagement along with substance use were considered as maladaptive and  
14  
15 7 dysfunctional ways of managing stressors (Costas-Muñiz, 2012; Parekh, et al., 2017). In other  
16  
17 8 studies, humor was viewed as a comforting and relaxing mechanism that promotes caregivers'  
18  
19 9 health (Tan, & Schneider, 2009; Christie, & Moore, 2005). It is worth further investigating if  
20  
21 10 promoting the use of humor in caregivers of children who have survived cancer can alleviate  
22  
23 11 caregivers' psychosocial health and improve the quality of life of caregivers and their families.  
24  
25  
26  
27  
28

29 12 This study found that having a girl child cancer survivor predicted caregivers' utilization  
30  
31 13 of more self-distraction as a coping strategy. Caregivers' active engagement in activities other  
32  
33 14 than thinking about current health problems of their girls might be a mechanism to forget the  
34  
35 15 problem and its consequences. There is a strong cultural belief in the Arab world that girls' role  
36  
37 16 in the community comes from their ability to form families, and born and raise children (Douki,  
38  
39 17 Ben Zineb, Nacef, & Halbreich, 2007). Caregivers in this study who were mostly mothers, might  
40  
41 18 engage in self-distraction in a medium amount to stop thinking about their daughters' abilities to  
42  
43 19 be future wives and mothers. The invasive treatments and their side effects might impose many  
44  
45 20 physical disabilities, and change body appearance and function.  
46  
47  
48

49 21 Although correlation analyses yielded low to medium associations, these were worth  
50  
51 22 mentioning and discuss to contribute to the limited evidence in this area. Having the lowest level  
52  
53 23 of education (elementary) was associated with utilizing more self-blame and self-distraction,  
54  
55  
56  
57  
58  
59  
60

1 while having the highest level of education (graduate) was associated with utilizing more  
2 instrumental support. Having higher forms of education might help caregivers to move from  
3 passive to active ways of coping. Instrumental use of support, which is utilizing help and advice  
4 from other people that might be professionals in supporting caregivers, was minimally studied in  
5 the literature. (Hill, 2016) showed that emotional social support seeking predicted better  
6 individual and family psychosocial functioning while instrumental social support seeking did  
7 not.

8         In another association, having current medical and/or educational problems was  
9 associated with more substance use. While substance use was not a frequent coping mechanism  
10 by caregivers in this study, almost half of the caregivers responded “2 = I've been doing this a  
11 little bit” to one of the two items that for the substance use sub-scale. These two items involve  
12 utilizing alcohol and/or drugs to overcome problems. Substance use affects the health and quality  
13 of life of individuals and their families (Belizaire, & Fuertes, 2011). Almost half the caregivers,  
14 who had some degree of engagement in substance use in this study, had between 3-5 children,  
15 and almost half of them had a relatively low family income. These results suggested the need to  
16 promote caregivers' limited time and financial resources toward solving their families' medical  
17 and educational needs.

18         In summary, caregivers of children who have survived cancer in this study utilized  
19 mostly religion coping. This study didn't investigate the reasons why caregivers didn't  
20 frequently use other ways of coping that are defined in the literature as problem-focused like  
21 active coping, or that involve other professionals or family members like use of emotional and  
22 instrumental support coping. Given that coping is a highly individualized process, there might be  
23 factors, like the cultural and social contexts, that characterize this process and are still under-

1 investigated. Further investigation of potential factors that affect caregiver coping will inform  
2 care-providers on how to support caregivers' utilization of adaptive and active ways of coping  
3 that promote caregivers' and families' health and well-being.

#### 4 **Strengths and Limitations**

5 This study was novel in investigating coping of caregivers of children who have survived  
6 cancer in Jordan. While the study utilized a convenient sample of caregivers from XXX, this  
7 later setting is the primary cancer center in Jordan and serves clients from different Jordanian  
8 cities. The utilization of the Brief COPE was helpful in investigating a wide variety of  
9 caregivers' coping styles. While this study performed the forward and backward translation of  
10 the Brief COPE into Arabic, and a committee discussed the words and phrases in both languages  
11 before agreeing on the final Arabic version, it did not investigate the psychometric properties of  
12 the Arabic Brief COPE. There were missing data related caregivers and child demographics (as  
13 reported in the tables), especially those related to age, and therefore, were not included in the  
14 analyses. Finally, this cross-sectional study did not investigate whether caregivers' utilization of  
15 different coping strategies change from the diagnosis, during treatment, and after surviving  
16 cancer.

#### 17 **Conclusions**

18 Caregivers of children who have survived cancer in Jordan utilized mostly passive coping  
19 strategies like religious coping and acceptance. Also, having a girl cancer survivor predicted  
20 caregivers' utilization of more self-distraction coping. Psychosocial interventions to support  
21 caregivers' utilization of active coping strategies like active coping, and use of emotional and  
22 instrumental support is important to promote caregivers' and families' psychosocial health and  
23 quality of life.

### Key Findings

1. Caregivers of children who have survived cancer mostly utilize religious and acceptance coping when dealing with everyday stressors.
2. Having a girl child cancer survivor predicted caregivers' utilization of more self-distraction coping strategy.

### What the Study Has Added

Caregivers of children who have survived cancer utilize passive coping strategies that may affect their families' health and wellbeing. Occupational therapy psychosocial interventions to support caregivers' engagement in active coping strategies are needed.

**References**

- Ahmadi, F., Hussin, N. A. M., & Mohammad, M. T. (2019). Religion, culture and meaning-making coping: A study among cancer patients in Malaysia. *Journal of Religion and Health*, 58(6), 1909-1924. <https://doi.org/10.1007/s10943-018-0636-9>
- Akoglu, H. (2018). User's guide to correlation coefficients. *Turkish Journal of Emergency Medicine*, 18(3), 91-93. <https://doi.org/10.1016/j.tjem.2018.08.001>
- American Cancer Society. Cancer Facts & Figures 2020. American Cancer Society. Atlanta, Ga. 2020.
- Biggs, A., Brough, P., & Drummond, S. (2017). Lazarus and Folkman's psychological stress and coping theory. *The handbook of stress and health: A guide to research and practice*, 351-364.
- Bonner, M. J., Hardy, K. K., Willard, V. W., & Gururangan, S. (2009). Additional evidence of a nonverbal learning disability in survivors of pediatric brain tumors. *Children's Health Care*, 38(1), 49-63. <https://doi.org/10.1080/02739610802615849>
- Carver, C. S., Scheier, M. F., & Weintraub, J. K. (1989). Assessing coping strategies: A theoretically based approach. *Journal of personality and social psychology*, 56(2), 267-283. 0022-3514/89/\$00.75.
- Carver, C. S., & Connor-Smith, J. (2010). Personality and coping. *Annual review of psychology*, 61, 679-704.
- Christie, W., & Moore, C. (2005). The impact of humor on patients with cancer. *Clinical Journal of Oncology Nursing*, 9(2), 211.
- Costas-Muñiz, R. (2012). Hispanic adolescents coping with parental cancer. *Supportive Care in Cancer*, 20(2), 413-417. doi: 10.1007/s00520-011-1283-9

## CAREGIVER COPING AFTER PEDIATRIC CANCER

18

- 1  
2  
3 1 Douki, S., Zineb, S. B., Nacef, F., & Halbreich, U. (2007). Women's mental health in the Muslim  
4 world: Cultural, religious, and social issues. *Journal of Affective Disorders, 102*(1-3),  
5 2  
6 177-189. <https://doi.org/10.1016/j.jad.2006.09.027>  
7 3  
8  
9  
10 4 Elsheshtawy, E. A., Abo-Elez, W. F., Ashour, H. S., Farouk, O., & zaafarany, M. I. E. E. (2014).  
11 Coping strategies in Egyptian ladies with breast cancer. *Breast Cancer: Basic and*  
12 5  
13 *Clinical Research, 8*, BCBCR-S14755. doi:10.4137/BCBCr.s14755  
14 6  
15  
16  
17 7 Fladeboe, K., King, K., Kawamura, J., Gurtovenko, K., Stettler, N., Compas, B., ... & Katz, L. F.  
18 (2018). Featured article: caregiver perceptions of stress and sibling conflict during  
19 8  
20 pediatric cancer treatment. *Journal of pediatric psychology, 43*(6), 588-598.  
21 9  
22  
23  
24 10 Gage-Bouchard, E. A., Devine, K. A., & Heckler, C. E. (2013). The relationship between socio-  
25 demographic characteristics, family environment, and caregiver coping in families of  
26 11  
27 children with cancer. *Journal of clinical psychology in medical settings, 20*(4), 478-487.  
28 12  
29 DOI 10.1007/s10880-013-9362-3  
30 13  
31  
32  
33 14 Greer, T. M. (2007). Measuring coping strategies among African Americans: An exploration of  
34 the latent structure of the COPE inventory. *Journal of Black Psychology, 33*(3), 260-277.  
35 15  
36 doi: 10.1177/0095798407302539  
37 16  
38  
39  
40 17 Hagan, T. L., Fishbein, J. N., Nipp, R. D., Jacobs, J. M., Traeger, L., Irwin, K. E., ... & Temel, J.  
41 S. (2017). Coping in patients with incurable lung and gastrointestinal cancers: A  
42 18  
43 validation study of the Brief COPE. *Journal of Pain and Symptom Management, 53*(1),  
44 19  
45 131-138. <https://doi.org/10.1016/j.jpainsymman.2016.06.005>  
46 20  
47  
48  
49 21 Haghghi, F. (2013). Correlation between religious coping and depression in cancer patients.  
50  
51 22  
52 *Psychiatria Danubina, 25*(3), 0-240.  
53  
54  
55  
56  
57  
58  
59  
60



## CAREGIVER COPING AFTER PEDIATRIC CANCER

19

- 1 Hill, E. M. (2016). Quality of life and mental health among women with ovarian cancer:  
2 examining the role of emotional and instrumental social support seeking. *Psychology,*  
3 *Health & Medicine, 21(5), 551-561.* <https://doi.org/10.1080/13548506.2015.1109674>
- 4 IBM Corp. (2015). *IBM SPSS Statistics for Windows.* Armonk, NY: IBM Corp.
- 5 Im Song, J., Shin, D. W., Choi, J. Y., Kang, J., Baik, Y. J., Mo, H., ... & Kim, E. J. (2011).  
6 Quality of life and mental health in family caregivers of patients with terminal cancer.  
7 *Supportive Care in Cancer, 19(10), 1519.*
- 8 Ismael, N., Lawson, L. M., Moqbel, M., & Little, L. (2018). Coping strategies among caregivers  
9 of children with autism spectrum disorders: A cluster analysis. *International Journal of*  
10 *Medical and Health Sciences, 7(3).*
- 11 Kirby, L. D., Qian, W., Adiguzel, Z., Jahanshahi, A. A., Bakracheva, M., Ballestas, M. C. O., ...  
12 & Smith, C. A. (2021). Appraisal and coping predict health and well-being during the  
13 COVID-19 pandemic: An international approach. *International Journal of Psychology.*
- 14 Knowles, S. R., Apputhurai, P., O'Brien, C. L., Ski, C. F., Thompson, D. R., & Castle, D. J.  
15 (2020). Exploring the relationships between illness perceptions, self-efficacy, coping  
16 strategies, psychological distress and quality of life in a cohort of adults with diabetes  
17 mellitus. *Psychology, health & medicine, 25(2), 214-228.*
- 18 Kohlsdorf, M., & Costa Junior, Á. L. (2011). Coping strategies and caregiver's anxiety in  
19 pediatric oncohematology. *Psicologia: Reflexão e Crítica, 24(2), 272-280.*
- 20 Kübler-Ross, E., & Kessler, D. (2009). The five stages of grief. In *Library of Congress Catalogin*  
21 *in Publication Data (Ed.), On grief and grieving (pp. 7-30).*

- 1  
2  
3 1 Lagman, R. A., Yoo, G. J., Levine, E. G., Donnell, K. A., & Lim, H. R. (2014). "Leaving it to  
4  
5 2 God" religion and spirituality among Filipina immigrant breast cancer survivors. *Journal*  
6  
7 3 *of Religion and Health*, 53(2), 449-460. doi: 10.1007/s10943-012-9648-z  
8  
9  
10 4 Lazarus, R. S., & Folkman, S. (1984). Stress, appraisal, and coping. Springer publishing  
11  
12 5 company.  
13  
14 6 Lee, J. W., & Cho, B. (2017). Prognostic factors and treatment of pediatric acute lymphoblastic  
15  
16 7 leukemia. *Korean Journal of Pediatrics*, 60(5), 129. doi: 10.3345/kjp.2017.60.5.129  
17  
18 8 Li, H. W., Lopez, V., Chung, O. J., Ho, K. Y., & Chiu, S. Y. (2013). The impact of cancer on the  
19  
20 9 physical, psychological and social well-being of childhood cancer survivors. *European*  
21  
22 10 *Journal of Oncology Nursing*, 17(2), 214-219.  
23  
24  
25 11 Litzelman, K., Kent, E. E., & Rowland, J. H. (2018). Interrelationships between health behaviors  
26  
27 12 and coping strategies among informal caregivers of cancer survivors. *Health Education &*  
28  
29 13 *Behavior*, 45(1), 90-100.  
30  
31  
32 14 Mayordomo, T., Viguer, P., Sales, A., Satorres, E., & Meléndez, J. C. (2016). Resilience and  
33  
34 15 coping as predictors of well-being in adults. *The Journal of Psychology*, 150(7), 809-821.  
35  
36 16 Ness, K. K., Hudson, M. M., Ginsberg, J. P., Nagarajan, R., Kaste, S. C., Marina, N., ... &  
37  
38 17 Gurney, J. G. (2009). Physical performance limitations in the Childhood Cancer Survivor  
39  
40 18 Study cohort. *Journal of Clinical Oncology*, 27(14), 2382.  
41  
42  
43 19 Ng, G. C., Mohamed, S., Sulaiman, A. H., & Zainal, N. Z. (2017). Anxiety and depression in  
44  
45 20 cancer patients: the association with religiosity and religious coping. *Journal of Religion*  
46  
47 21 *and Health*, 56(2), 575-590. DOI 10.1007/s10943-016-0267-y  
48  
49  
50  
51  
52  
53  
54  
55  
56  
57  
58  
59  
60

- 1 Nipp, R. D., El-Jawahri, A., Fishbein, J. N., Eusebio, J., Stagl, J. M., Gallagher, E. R., ... &  
2 Temel, J. S. (2016). The relationship between coping strategies, quality of life, and mood  
3 in patients with incurable cancer. *Cancer*, *122*(13), 2110-2116. DOI: 10.1002/ncr.30025  
4  
5 Norberg, A. L., Lindblad, F., & Boman, K. K. (2005). Coping strategies in parents of children  
6 with cancer. *Social Science & Medicine*, *60*(5), 965-975.  
7 <https://doi.org/10.1016/j.socscimed.2004.06.030>  
8  
9 Nunes, C., Pérez-Padilla, J., Martins, C., Pechorro, P., Ayala-Nunes, L., & Ferreira, L. I. (2021).  
10 The Brief COPE: Measurement Invariance and Psychometric Properties among  
11 Community and At-Risk Portuguese Parents. *International Journal of Environmental*  
12 *Research and Public Health*, *18*(6), 2806. <https://doi.org/10.3390/ijerph18062806>  
13  
14 O'Brien, C. W., & Moorey, S. (2010). Outlook and adaptation in advanced cancer: a systematic  
15 review. *Psycho-oncology*, *19*(12), 1239-1249.  
16  
17 Parekh, N. K., Shah, S., McMaster, K., Speziale, A., Yun, L., Nguyen, D. L., ... & Kane, S.  
18 (2017). Effects of caregiver burden on quality of life and coping strategies utilized by  
19 caregivers of adult patients with inflammatory bowel disease. *Annals of*  
20 *Gastroenterology: Quarterly Publication of the Hellenic Society of Gastroenterology*,  
21 *30*(1), 89. doi: 10.20524/aog.2016.0084  
22  
23 Pierce, L., Hocking, M. C., Schwartz, L. A., Alderfer, M. A., Kazak, A. E., & Barakat, L. P.  
24 (2017). Caregiver distress and patient health-related quality of life: psychosocial  
25 screening during pediatric cancer treatment. *Psycho-oncology*, *26*(10), 1555-1561.  
26  
27 Pinquart, M. (2018). Parenting stress in caregivers of children with chronic physical condition—  
28 A meta-analysis. *Stress and Health*, *34*(2), 197-207. <https://doi.org/10.1002/smi.2780>

## CAREGIVER COPING AFTER PEDIATRIC CANCER

22

- 1  
2  
3 1 Rafferty, K. A. (2015). "Everything remains uncertain": Theorizing parents' communication  
4  
5 2 about uncertainty, hope, and hopelessness while managing complex pediatric chronic  
6  
7 3 conditions (Doctoral dissertation, The University of Wisconsin-Milwaukee).  
8  
9  
10 4 Tan, T., & Schneider, M. A. (2009). Humor as a coping strategy for adult-child caregivers of  
11  
12 5 individuals with Alzheimer's disease. *Geriatric Nursing*, 30(6), 397-408.  
13  
14 6 <https://doi.org/10.1016/j.gerinurse.2009.09.004>  
15  
16  
17 7 Thuné-Boyle, I. C. V., Stygall, J., Keshtgar, M. R. S., Davidson, T. I., & Newman, S. P. (2011).  
18  
19 8 Religious coping strategies in patients diagnosed with breast cancer in the UK.  
20  
21 9 *Psycho-oncology*, 20(7), 771-782. doi: 10.1002/pon.1784  
22  
23  
24 10 Üzar-Özçetin, Y. S., & Dursun, S. İ. (2020). Quality of life, caregiver burden, and resilience  
25  
26 11 among the family caregivers of cancer survivors. *European Journal of Oncology*  
27  
28 12 *Nursing*, 48, 101832. <https://doi.org/10.1016/j.ejon.2020.101832>  
29  
30  
31 13 Vrettos, I., Kamposioras, K., Kontodimopoulos, N., Pappa, E., Georgiadou, E., Haritos, D., ... &  
32  
33 14 Niakas, D. (2012). Comparing health-related quality of life of cancer patients under  
34  
35 15 chemotherapy and of their caregivers. *The Scientific World Journal*, 2012.  
36  
37 16 <https://doi.org/10.1100/2012/135283>  
38  
39  
40 17 World Health Organization. Process of translation and adaptation of instruments. Geneva: World  
41  
42 18 Health Organization. [http://www.who.int/research\\_tools/translation](http://www.who.int/research_tools/translation), accessed 1 October  
43  
44 19 2021.  
45  
46  
47 20  
48 21  
49 22  
50 23  
51 24  
52 25  
53 26  
54 27  
55  
56  
57  
58  
59  
60

## CAREGIVER COPING AFTER PEDIATRIC CANCER

23

**1 Table 1**  
**2 Demographic Characteristics of Caregivers and Children N= 102**

| Caregiver Demographics |                      |                      | Child Demographics   |                      |                      |           |
|------------------------|----------------------|----------------------|----------------------|----------------------|----------------------|-----------|
| Relationship to child  | Mother               | 65(63.7%)            | Child gender         | Male                 | 53(52%)              |           |
|                        | Father               | 31(30.4%)            |                      | Female               | 45(44.1%)            |           |
|                        | Others               | 4(3.9%)              |                      | Prefer not to report | 4(3.9%)              |           |
|                        | Prefer not to report | 2(2%)                |                      |                      |                      |           |
| Social status          | Married              | 85(83.3%)            | Child School Grade   | Elementary           | 35(34.3%)            |           |
|                        |                      | Divorced             |                      | 1(1%)                | Middle               | 35(34.3%) |
|                        |                      | Other                |                      | 14(13.7)             | High                 | 16(15.7%) |
|                        |                      | Prefer not to report | 2(2%)                | Number of Siblings   | <3                   | 28(27.5%) |
| Educational status     | Elementary           | 22(21.6%)            | 3-5                  |                      | 61(59.8%)            |           |
|                        |                      | High school          | 45(44.1%)            |                      | >5                   | 12(11.8%) |
|                        |                      | Diploma              | 13(12.7%)            | Order of child       | 1st                  | 23(22.5%) |
|                        |                      | Bachelors            | 16(15.7%)            |                      | 2nd                  | 28(27.5%) |
| Graduate               | 3(2.9%)              | 3rd                  | 21(20.6%)            |                      |                      |           |
| Prefer not to report   | 3(2.9%)              | 4th-7th              | 29(28.4%)            |                      |                      |           |
| Employment status      | Full-time            | 30(29.4%)            | Total family members | Prefer not to report | 1                    |           |
|                        |                      | Part-time            |                      | 9(8.8%)              | <5                   | 12(11.8%) |
|                        |                      | Un-employed          |                      | 50(49%)              | >5                   | 86(84.3%) |
|                        |                      | Prefer not to report |                      | 13(12.7%)            | Prefer not to report | 4(3.9%)   |
| Monthly income         | <500                 | 62(60.8%)            | Residence type       | House                | 30(29.4%)            |           |
|                        |                      | 500-1000             |                      | 27(26.5%)            | Apartment            | 71(69.6%) |
|                        |                      | >1000                |                      | 5(4.9%)              | Prefer not to report | 1(1%)     |
|                        |                      | Prefer not to report |                      | 6(5.9%)              |                      |           |

4 Notes: N= Total sample number, n (%)= Number and percent of participants

5  
6  
7  
8  
9  
10  
11

## CAREGIVER COPING AFTER PEDIATRIC CANCER

24

**Table 2**  
*Condition-Related Characteristics of Children N= 102*

|                        |                       |           |
|------------------------|-----------------------|-----------|
| Cancer diagnosis n (%) | Acute leukemia        | 44(43.1%) |
|                        | Rhabdomyosarcoma      | 15(14.7%) |
|                        | Bone tumors           | 11(10.8%) |
|                        | Wilms                 | 9(8.8%)   |
|                        | Lymphoma              | 5(4.9%)   |
|                        | Neuroblastoma         | 2(2%)     |
|                        | Germ-cell tumors      | 2(2%)     |
|                        | Brain tumors          | 1(1%)     |
|                        | Nasopharyngeal cancer | 1(1%)     |
|                        | Optic pathway glioma  | 1(1%)     |
|                        | Prefer not to report  | 11(10.8%) |

*Notes:* N= Total sample number, n (%)= Number and percent of participants

## CAREGIVER COPING AFTER PEDIATRIC CANCER

25

**Table 3***Descriptive Statistics of the Brief COPE Sub-Scale Scores N= 102*

| Brief COPE Subscales        | Mean | Median | Range | Min  | Max  |
|-----------------------------|------|--------|-------|------|------|
| Religion                    | 6.42 | 7.00   | 6.00  | 2.00 | 8.00 |
| Acceptance                  | 5.95 | 6.00   | 6.00  | 2.00 | 8.00 |
| Planning                    | 5.10 | 5.00   | 6.00  | 2.00 | 8.00 |
| Active Coping               | 5.01 | 5.00   | 6.00  | 2.00 | 8.00 |
| Positive Re-framing         | 4.96 | 5.00   | 6.00  | 2.00 | 8.00 |
| Use of Emotional Support    | 4.89 | 5.00   | 6.00  | 2.00 | 8.00 |
| Use of Instrumental Support | 4.83 | 5.00   | 6.00  | 2.00 | 8.00 |
| Venting                     | 4.30 | 4.00   | 6.00  | 2.00 | 8.00 |
| Self-Distraction            | 4.10 | 4.00   | 6.00  | 2.00 | 8.00 |
| Denial                      | 3.69 | 3.00   | 6.00  | 2.00 | 8.00 |
| Self-Blame                  | 3.52 | 3.00   | 6.00  | 2.00 | 8.00 |
| Substance Use               | 3.11 | 2.00   | 6.00  | 2.00 | 8.00 |
| Behavioral Dis-engagement   | 3.09 | 2.00   | 5.00  | 2.00 | 7.00 |
| Humor                       | 2.98 | 2.00   | 5.00  | 2.00 | 7.00 |

Notes: N= Total sample size, Min= Minimum subscale score, Max= Maximum subscale score

## CAREGIVER COPING AFTER PEDIATRIC CANCER

26

**Figure 1**  
*Caregivers' Utilization of Different Coping Strategies*

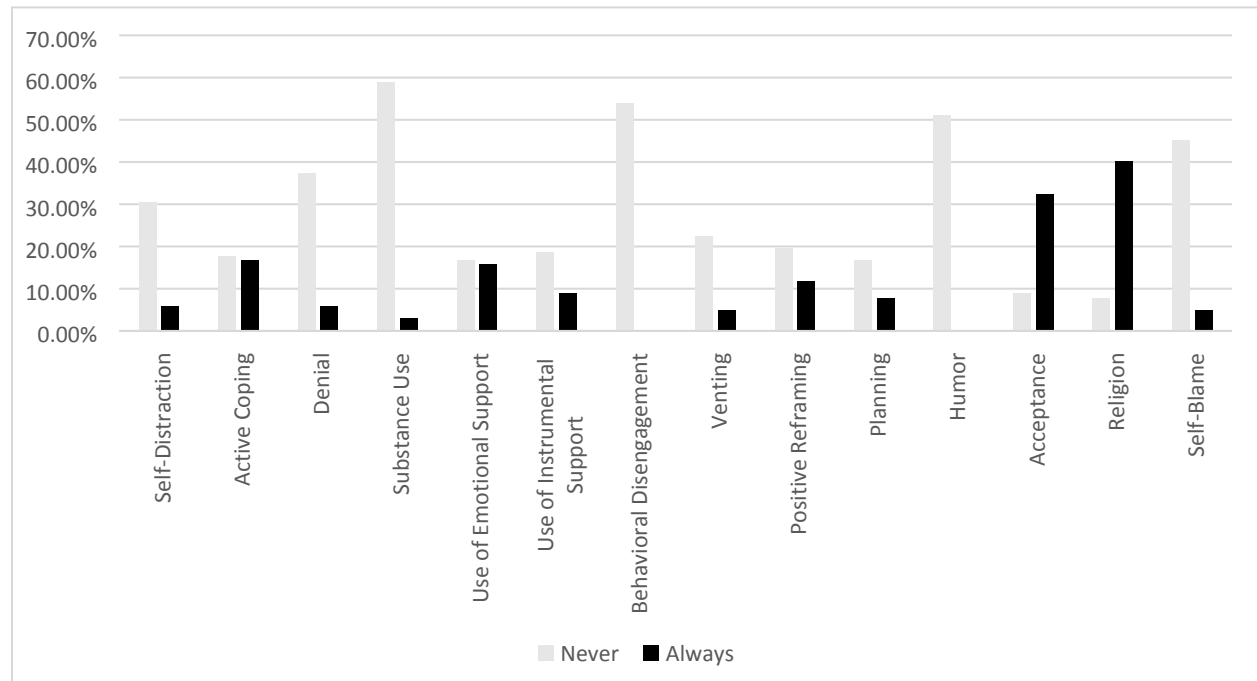

Notes: Responses 1= Never and 4= Always were used in this figure.



## CAREGIVER COPING AFTER PEDIATRIC CANCER

27

**Table 4**  
*Correlations between Caregiver Characteristics and Coping Strategies*

|                             | Relationship to Child | Educational Level | Employment Status | Child Gender | Current Health Problems | Child order | Number of Siblings |
|-----------------------------|-----------------------|-------------------|-------------------|--------------|-------------------------|-------------|--------------------|
| Self-Distracted             |                       | -.273**           | .216*             | .297**       |                         |             |                    |
| Substance Use               |                       | .006              | .042              | .003         | .255*                   |             |                    |
| Use of Emotional Support    |                       |                   |                   | .201*        | .011                    |             |                    |
| Use of Instrumental Support |                       | -.268**           |                   | .211*        |                         | -.226*      |                    |
| Venting                     | -.213*                | .007              |                   |              |                         |             | -.203*             |
| Self-Blame                  | -.236*                | -.217*            |                   |              |                         |             | .042               |
|                             | .034                  | .031              |                   |              |                         |             |                    |

Notes: \* indicates  $p < .05$ , \*\* indicates  $p < .01$

# BMJ Paediatrics Open

## Exploring Coping Strategies among Caregivers of Children who have Survived Pediatric Cancer in Jordan

|                               |                                                                                                                                                                                                                                                                              |
|-------------------------------|------------------------------------------------------------------------------------------------------------------------------------------------------------------------------------------------------------------------------------------------------------------------------|
| Journal:                      | <i>BMJ Paediatrics Open</i>                                                                                                                                                                                                                                                  |
| Manuscript ID                 | bmjpo-2023-002453.R1                                                                                                                                                                                                                                                         |
| Article Type:                 | Original research                                                                                                                                                                                                                                                            |
| Date Submitted by the Author: | 13-Feb-2024                                                                                                                                                                                                                                                                  |
| Complete List of Authors:     | Ismael, Noor; Jordan University of Science and Technology<br>Jaber, Ala'a; Jordan University of Science and Technology<br>Malkawi, Somaya; The University of Jordan<br>Al Awady, Sherin; King Hussein Cancer Center<br>Ismael, Taleb; King Hussein Cancer Center, Pediatrics |
| Keywords:                     | Caregivers, Psychology                                                                                                                                                                                                                                                       |
|                               |                                                                                                                                                                                                                                                                              |

SCHOLARONE™  
Manuscripts



I, the Submitting Author has the right to grant and does grant on behalf of all authors of the Work (as defined in the below author licence), an exclusive licence and/or a non-exclusive licence for contributions from authors who are: i) UK Crown employees; ii) where BMJ has agreed a CC-BY licence shall apply, and/or iii) in accordance with the terms applicable for US Federal Government officers or employees acting as part of their official duties; on a worldwide, perpetual, irrevocable, royalty-free basis to BMJ Publishing Group Ltd ("BMJ") its licensees and where the relevant Journal is co-owned by BMJ to the co-owners of the Journal, to publish the Work in this journal and any other BMJ products and to exploit all rights, as set out in our [licence](#).

The Submitting Author accepts and understands that any supply made under these terms is made by BMJ to the Submitting Author unless you are acting as an employee on behalf of your employer or a postgraduate student of an affiliated institution which is paying any applicable article publishing charge ("APC") for Open Access articles. Where the Submitting Author wishes to make the Work available on an Open Access basis (and intends to pay the relevant APC), the terms of reuse of such Open Access shall be governed by a Creative Commons licence – details of these licences and which [Creative Commons](#) licence will apply to this Work are set out in our licence referred to above.

Other than as permitted in any relevant BMJ Author's Self Archiving Policies, I confirm this Work has not been accepted for publication elsewhere, is not being considered for publication elsewhere and does not duplicate material already published. I confirm all authors consent to publication of this Work and authorise the granting of this licence.

1  
2  
3  
4  
5  
6  
7  
8  
9

1  
2  
3

**Exploring Coping Strategies among Caregivers of Children who have Survived Pediatric  
Cancer in Jordan**

4 Noor Ismael<sup>1</sup>, Ala'a Jaber<sup>2</sup>, Somaya Malkawi<sup>3</sup>, Sherin Al Awady<sup>4</sup> & Taleb Ismael<sup>5</sup>

10  
11  
12  
13  
14  
15  
16

5  
6

**Authors' Note**

17 Noor Ismael, PhD, MSc, OTR/L, is Assistant Professor of Occupational Therapy, Jordan

18 University of Science and Technology, Irbid, Jordan, [ntismael@just.edu.jo](mailto:ntismael@just.edu.jo).

19  
20  
21  
22  
23

8  
9

<https://orcid.org/0000-0002-2060-4923>

24 Ala'a Jaber, PhD, MSc, OTR/L, is Assistant Professor of Occupational Therapy, Jordan

25  
26  
27  
28  
29

10  
11  
12

University of Science and Technology, Irbid, Jordan, [afjaber@just.edu.jo](mailto:afjaber@just.edu.jo).

13  
14  
15  
16  
17

12

<https://orcid.org/0000-0001-9664-2048>

18 Somaya Malkawi, PhD, MSc, OTR/L, is Professor of Occupational Therapy, University of

19  
20  
21  
22  
23

13  
14

Jordan, Amman, Jordan, [somamalkawi@gmail.com](mailto:somamalkawi@gmail.com).

24 Sherin Al Awady, RN, King Hussein Cancer Center, Amman, Jordan, [sawady@khcc.jo](mailto:sawady@khcc.jo).

25 Taleb Ismael, MD, was consultant of Pediatric Hematology and Oncology at King Hussein

26  
27  
28  
29  
30

16  
17

Cancer Center at the time of the study, Amman, Jordan, [talebm56@gmail.com](mailto:talebm56@gmail.com).

31  
32  
33  
34  
35  
36  
37  
38  
39  
40  
41  
42  
43  
44  
45  
46

18  
19

**Corresponding Author**

47 Correspondence regarding this manuscript should be addressed to the first author, Dr. Noor

48  
49  
50  
51  
52  
53

20  
21  
22

Ismael, Assistant Professor of Occupational Therapy, Department of Rehabilitation

54 Sciences, Faculty of Applied Medical Sciences, Jordan University of Science and

55  
56  
57  
58  
59  
60

23  
24

Technology, Irbid, Jordan, [ntismael@just.edu.jo](mailto:ntismael@just.edu.jo), <https://orcid.org/0000-0002-2060-4923>

### **Statement of Contributor ship**

NI and TI researched literature and conceived the study. All authors were involved in protocol development. NI, TI and AJ were involved in gaining ethical approval, patient recruitment, and data analysis. NI and TI wrote the first draft of the manuscript. All authors reviewed and edited the manuscript and approved the final version of the manuscript.

### **Acknowledgments**

The research team would like to thank caregivers who had participated in this study and shared their time experiences for the purposes of this project.

### **Data Availability Statement**

Authors can share the data of this study upon reasonable request.

### **Conflict of Interest Statement**

The authors of this study have no conflict of interest.

### **Funding Statement**

This study received no funding.

### **Research Ethics**

Institutional Review Board of King Hussein Cancer Center approved the study (Research # 17 KHCC 121).

## Abstract

*Objective:* To explore the coping strategies of caregivers of children who have survived pediatric cancer in Jordan. *Materials and Methods:* This study utilized a cross-sectional survey design, and convenient sampling. The sample included 102 caregivers of children who have survived cancer, and outcome measures included the Arabic-translated Brief COPE, and caregiver and child demographic and condition questionnaire. Data analyses included descriptive statistics, analysis of frequencies, Spearman-rank order correlations, and linear regression. *Results:* Caregivers most frequently utilized religion coping (mean= 6.42, SD= 1.85), followed by acceptance (mean = 5.95, SD= 1.96) and planning (mean = 5.05, SD= 1.94). The least utilized coping strategies were humor (mean = 2.98, SD= 1.24) and behavioral dis-engagement as coping strategies (mean = 3.01, SD= 1.42). Having a female child predicted more self-distraction utilization ( $\beta = .265$ ,  $p = .007$ ). *Conclusion:* Caregivers of children who have survived cancer in Jordan frequently utilize passive coping strategies like religion and acceptance coping to overcome daily life stressors. Caregivers might benefit from psychosocial occupational therapy interventions to support their engagement in more active or problem-focused coping strategies.

*Keywords:* cancer, neoplasms, child, caregivers, psychology, mental health

## What is already known on this topic

Caregivers of adults' cancer survivors engage in emotion-focused coping more than problem focused coping. Caregivers' coping strategies in families of children who have cancer is associated to certain demographic factors like gender and educational levels. Caregiver coping after surviving cancer is poorly understood.

**What this study adds**

Caregivers of children who have survived cancer mostly utilize religious and acceptance coping when dealing with everyday stressors. Also, having a girl child cancer survivor predicted caregivers' utilization of more self-distraction coping strategy.

**How this study might affect research, practice or policy**

Future research should investigate if caregivers' coping change between having the cancer diagnosis and after surviving the cancer condition. Care-providers should evaluate caregiver coping and provide psychosocial interventions to support caregivers' engagement in active coping strategies.

## 1 **Exploring Coping Strategies among Caregivers of Children who have Survived Pediatric** 2 **Cancer in Jordan**

3 According to the American Cancer Society, cancer is the second leading cause of death in  
4 children ages one to fourteen years, after accidents.[1] Cancer is a serious medical condition that  
5 affects not only people who have this condition, but also their surrounded families and  
6 friends.[2] After surviving the cancer condition, many children and caregivers deal with residual  
7 physical,[3] cognitive[4] and/or psychosocial challenges that may affect their daily life  
8 functioning.[5] A number of studies have investigated caregiver coping during pediatric cancer  
9 treatments.[6,7] However, limited evidence investigated how caregivers cope after surviving the  
10 cancer condition. To authors' knowledge, there were no studies in this area in Jordan or the Arab  
11 world. Therefore, this study aimed to explore the coping strategies of caregivers of children who  
12 have survived cancer in Jordan.

### 13 **Literature Review**

14 Caregivers of children who have cancer experience elevated stress levels as compared to  
15 other medical and/or educational childhood conditions.[8] There are several cancer-related  
16 factors that contribute to caregivers' stress including disruption in everyday routine changes, and  
17 participation restrictions while being on the cancer treatment.[9] The nature of the cancer  
18 condition, and invasive procedures (e.g., lumbar punctures, bone marrow aspirations) associated  
19 with cancer treatments also contribute to caregiver stress and poor quality of life.[10] While  
20 stress is greater in caregivers of recently diagnosed individuals, it continues to affect caregivers  
21 during treatment and even after cancer recovery.[11] There is accumulating evidence that looked  
22 at caregivers' negative psychological states like stress, anxiety, or depression;[12,13] however,  
23 there is little evidence on how caregivers' of children with or who have survived cancer cope



## CAREGIVER COPING AFTER PEDIATRIC CANCER

6

1 with these states. Ways of coping influence people's adaptations to various conditions,[14] and  
2 contribute to their health and wellbeing.[15]

3 Coping refers to the thoughts and actions people use to manage stressful situations.[16]

4 Coping strategies are highly individualized because of people's differences in resources,  
5 experiences, motivation, preferences, and skills for coping. The early work of Carver and Scheier  
6 characterized people's coping into several different coping strategies, including planning, use of  
7 emotional support, and denial.[17] Researchers differ in how they classify different coping  
8 strategies, like problem-focused or emotion-focused;[18] and adaptive or maladaptive  
9 coping.[19] Engaging in adaptive or problem-focused coping strategies like planning or active  
10 coping contribute to better caregiver psychosocial and physical health, and quality of life.[20] On  
11 the other hand, mal-adaptive coping strategies like substance use negatively affect the health and  
12 quality of life of caregivers and surrounding family members.[21]

13 Unlike stress in caregivers of children with cancer, caregivers' coping strategies were  
14 scarcely studied in the literature. A study by Gage-Bouchard et al investigated caregiver coping  
15 strategies in families of children with cancer, and found associations between caregiver coping  
16 and a number of socio-demographical factors.[6] For example, Mothers utilized active coping,  
17 instrumental support, religious coping, and emotional support, more than fathers. Also, gender  
18 and educational levels were linked to certain maladaptive coping strategies like substance use.[6]  
19 While this later study investigated potential factors that affect caregiver coping during pediatric  
20 cancer, evidence on caregiver coping after surviving pediatric cancer remains poorly understood.  
21 A relatively recent study of caregivers of lung and colorectal cancer survivors, found that  
22 caregivers engaged in emotion-focused coping (i.e., religion, acceptance, positive re-framing,

1 and emotional support) more than problem focused coping.[9] Care recipients in this study were  
2  
3  
4  
5  
6  
7  
8  
9  
10  
11  
12  
13  
14  
15  
16  
17  
18  
19  
20  
21  
22  
23  
24  
25  
26  
27  
28  
29  
30  
31  
32  
33  
34  
35  
36  
37  
38  
39  
40  
41  
42  
43  
44  
45  
46  
47  
48  
49  
50  
51  
52  
53  
54  
55  
56  
57  
58  
59  
60

1 and emotional support) more than problem focused coping.[9] Care recipients in this study were  
2 adult cancer survivors not children.

3           Research in this area is needed to build on the evidence about caregivers coping during  
4 and after surviving pediatric cancer. The novelty in this study is to investigate what coping  
5 strategies caregivers of children who have survived cancer utilized to overcome daily life  
6 challenges. Up to authors' knowledge, there were no studies about caregivers' coping in Jordan.  
7 We hypothesized –since children have survived the cancer condition- that caregivers will utilize  
8 more problem-focused coping strategies to overcome daily life challenges. Characterizing  
9 caregiver coping strategies is important to investigate intervention strategies that promote the  
10 selection of adaptive or problem-focused coping strategies, and therefore, enhance caregivers'  
11 psychosocial health. Therefore, this study aimed to explore the coping strategies of caregivers of  
12 children who have survived cancer.

## Materials and Methods

### Design

15           This study utilized a cross-sectional survey design to explore the coping strategies of  
16 caregivers of children who have survived pediatric cancer.

### Participants and Settings

18           The study recruited caregivers of children who have survived cancer through the pediatric  
19 quality of life clinic at King Hussein Cancer Center (KHCC) in Jordan. Care-providers in this  
20 clinic (pediatric oncologist and specialized oncology nurses) follow-up yearly with children and  
21 their caregivers in relation to child and family health and quality of life after surviving the cancer  
22 condition. Eligibility criteria for caregivers to participate in this study included: (a) Caregivers of  
23 children who have survived cancer, (b) children were clients in the pediatric survivors' clinic at

1 KHCC, (c) children were off cancer treatment for at least two years, and (d) caregiver who can  
2 read and write in Arabic in order to complete the study survey. The study excluded caregivers  
3 who did not meet the inclusion criteria mentioned above.

#### 4 **Instruments**

##### 5 ***The Brief COPE[17]***

6 It is a shorter version of the COPE Inventory, and measures individuals' ways of coping  
7 in different life situations. The Brief COPE consists of fourteen coping sub-scales with two items  
8 in each (28 items in total): *Self-distraction* (e.g., I've been turning to work or other activities to  
9 take my mind off things); *Active coping* (e.g., I've been concentrating my efforts on doing  
10 something about the situation I'm in); *Denial* (e.g. I've been saying to myself "this isn't real);  
11 *Substance use* (e.g., I've been using alcohol or other drugs to make myself feel better); *Use of*  
12 *emotional support* (e.g., I've been getting emotional support from others); *Use of instrumental*  
13 *support* (e.g., I've been getting help and advice from other people); *Behavioral disengagement*  
14 (e.g., I've been giving up trying to deal with it), *Venting* (e.g., I've been giving up trying to deal  
15 with it); *Positive reframing* (e.g., I've been trying to see it in a different light, to make it seem  
16 more positive); *Planning* (e.g., I've been trying to come up with a strategy about what to do);  
17 *Humor* (e.g., I've been making jokes about it), *Acceptance* (e.g., I've been accepting the reality of  
18 the fact that it has happened); *Religion* (e.g., I've been trying to find comfort in my religion or  
19 spiritual beliefs); and *Self-blame* (I've been criticizing myself).

20 Subscales' scores are generated by summing items for each sub-scale. Higher sub-scale  
21 scores indicate a respondent's tendency to engage in a particular coping strategy.[22] Several  
22 studies explored the psychometric properties of Brief COPE. For example, Hagan et al, which  
23 sampled individuals newly diagnosed with incurable lung and gastrointestinal cancers and

1 suggested that the Brief COPE had good psychometric properties among this population.[23]

2 Also, Nunes et al found that the Brief COPE is a psychometrically sound instrument that shows  
3 measurement invariance across samples and good reliability.[24]

4 Researchers in this study performed the forward-backward translation of the original  
5 English Brief COPE into the Arabic language (after obtaining permission from the primary  
6 COPE author Dr. Carver by e-mail) according to World Health Organization's recommendations  
7 for forward-backward translations of assessment tools.[25] The first author (who knows Arabic  
8 and English very well, is a health-care professional, and an expert in the terms of the Brief  
9 COPE) performed the forward translation of the Brief COPE from English into Arabic. An  
10 Expert panel (first and third authors) reviewed the Arabic translated Brief COPE terminology,  
11 discussed any conflicts, and agreed on the pre-final Arabic version. This expert panel took into  
12 consideration cultural adaptation, common language use, and conceptual equivalence of the  
13 scale. Then, a bilingual health-care professional (occupational therapist, had a master's degree in  
14 rehabilitation, and expert in the language of the Brief COPE), performed the backward  
15 translation of the Arabic-translated Brief COPE into English. An expert panel (first and third  
16 authors) reviewed the backward translated version, discussed conflicts in wordings, changed, and  
17 agreed on the final Arabic version.

### 18 *The Demographic and Condition Questionnaire*

19 Researchers in this study designed this questionnaire to collect child and caregiver  
20 demographic and condition information, like child age, gender, diagnosis, medical and  
21 educational services, and caregiver education and social status.

### 22 **Procedures**

1           The internal review board at KHCC approved this study (Research # 17 KHCC 121).  
2  
3  
4  
5           2        Researchers prepared the study survey, which consisted of the Child and Caregiver Demographic  
6  
7           3        and Condition Questionnaire and the Arabic version of the Brief COPE. A registered nurse at the  
8  
9           4        pediatric survivors' clinic at KHCC. (fourth author) initiated contact with caregivers who were  
10  
11           5        waiting for their appointment and invited them to participate in this study. The nurse explained  
12  
13           6        the study to caregivers, and assured them that their participation is voluntary, and that they can  
14  
15           7        quit the study at any time. Caregivers who agreed to participate provided informed consent and  
16  
17           8        completed the study survey. Data collection took place only at the pediatric survivors' clinic at  
18  
19           9        KHCC. All completed survey papers are kept in a secure place at Jordan University of Science  
20  
21  
22  
23  
24           10       and Technology.

### 26           11        **Data Analyses**

28           12        All data analyses procedures utilized the Statistical Package for Social Science.[26] After  
29  
30           13        data cleaning, normality and homogeneity of variance was inspected. Then Brief COPE sub-  
31  
32           14        scales were calculated by summing items for each subscale. Considering the Likert scale used in  
33  
34           15        the Brief COPE (1= Never to 4= Always), the minimum scores a participant can obtain is 2  
35  
36           16        while the maximum score is 8. Therefore, sub-scales' scores from 6-8 reflect greater coping  
37  
38           17        strategy utilization.[27] Data analyses included calculating descriptive statistics (mean, median,  
39  
40           18        range, and standard deviation) and analysis of frequencies of child and caregiver demographics,  
41  
42           19        and the Brief COPE sub-scale scores. Spearman-Rank Order Correlation was used to explore if  
43  
44           20        there were relationships between child and caregiver demographics, and caregiver utilization of  
45  
46           21        certain coping strategies. This study referred to Akoglu (2018) in classifying the strengths of  
47  
48           22        correlations as follows: Negligible (0 to .09), Weak (.1 to .19), Moderate (.2 to .29), Strong (.3 to  
49  
50           23        .59), Very strong (.6 to .89), and Perfect (.9-1).[28] Then, Linear Regression analysis explored  
51  
52  
53  
54  
55  
56  
57  
58  
59  
60

1 how significant correlates affect caregiver coping strategy utilization. The significance level was  
2 set at .05 for the correlations and regression analyses.

### 3 Results

4 One hundred and two caregivers participated in this study and completed the study  
5 survey. Around 66% of the caregivers were mothers, 83% were married, only 18 % had a  
6 Bachelor degree, and almost half of them were un-employed. Around half of the children who  
7 have survived cancer were males, and 34.3% were in elementary school grades 1-6. Around 60%  
8 of the children had between three to five siblings, and 22.5% were first in order among their  
9 siblings. The most common cancer condition was acute Leukemia 43.1%, followed by  
10 Rhabdomyosarcoma (11.8%), bone tumors (10.8%), and Wilms (8.8%). Thirty-five percent had  
11 current health problems, and 56% did not receive rehabilitative services (occupational therapy,  
12 physical therapy, special education, and\ or speech and language services) (see Tables 1 and 2  
13 for additional demographic and condition-related characteristics).

14 Caregivers in this study mostly utilized religious coping ( $M= 6.42$ ,  $SD= 1.85$ ), followed  
15 by acceptance ( $M= 5.95$ ,  $SD= 1.96$ ) and planning ( $M= 5.05$ ,  $SD= 1.94$ ) (see Table 3). Caregivers  
16 rarely utilized humor ( $M= 2.98$ ,  $SD= 1.24$ ) and behavioral dis-engagement as coping strategies  
17 ( $M= 3.01$ ,  $SD= 1.42$ ). Out of the 102, four caregivers almost always utilize substance use as a  
18 coping strategy (see Figure 1).

19 A number of caregiver and child demographics were correlated with utilizing different  
20 coping strategies. For example, caregiver educational levels were negatively associated with self-  
21 distraction ( $r_s= -.273$ ,  $p= .006$ ), use of instrumental support ( $r_s = -.268$ ,  $p = .007$ ), and self-blame  
22 ( $r_s = -.217$ ,  $p = .031$ ). In specific, elementary school education (a lower level of education) was  
23 positively associated with utilizing more self-distraction ( $r_s = .227$ ,  $p = .022$ ) and more self-

1 blame ( $r_s = .248, p = .012$ ), while having a bachelor's degree (a higher level of education) was  
2 associated with less self-distraction ( $r_s = -.206, p = .038$ ). Also, having a graduate degree was  
3 associated with more use of instrumental support ( $r_s = .249, p = .012$ ). Besides caregiver  
4 education, having a female child was positively associated with utilizing more self-distraction ( $r_s$   
5 =  $.284, p = .004$ ), use of emotional support ( $r_s = .201, p = .043$ ), and use of instrumental support  
6 ( $r_s = .205, p = .038$ ). Also, having current health or educational problems in children who have  
7 survived cancer was positively associated with more caregiver substance use utilization ( $r_s =$   
8  $.245, p = .015$ ) (see Table 4 for additional significant correlations). Linear regression showed that  
9 having a female child predicted more self-distraction utilization ( $\beta = .265, p = .007$ ).

### 10 Discussion

11 This study explored coping strategies among caregivers of children who have survived  
12 cancer in Jordan and analyzed potential associations between caregiver and child demographics  
13 and the utilization of different coping strategies. Caregivers most frequently utilized religion  
14 coping, followed by acceptance and planning. The least utilized coping strategies were humor  
15 and behavioral dis-engagement as coping strategies. More than half of the caregivers were  
16 mothers, and half of them were un-employed. Only a small percentage of the caregivers in this  
17 study had a bachelor's or a graduate educational degree. Demographical characteristics in this  
18 study will help in discussing caregiver utilization of different coping strategies in the following  
19 paragraphs.

20 Findings from this study showed that caregivers mostly utilized religious coping to  
21 overcome everyday stressors. Considering cancer as a very serious and life-threatening  
22 condition,[29] individuals with cancer and/or their caregivers might view cancer as a hopeless  
23 condition that has no effective treatment.[30] Therefore, caregivers might turn to spiritual and

1 religious coping mechanisms as more powerful and alleviating treatment options.[31] This  
2  
3 finding is aligned with much previous research on individuals with cancer in the Eastern;[32,33]  
4  
5 and Western countries.[34] Religious coping, especially in the early stages of cancer treatment,  
6  
7 may help caregivers in redefining potential stressors as beneficial,[32] and accepting the  
8  
9 condition and its consequences.[35]  
10  
11  
12  
13

14  
15 The novel finding from this study is that caregivers may continue to utilize religion  
16  
17 coping even after their children's survival from the cancer condition. Closely looking at the  
18  
19 characteristics of caregivers who frequently utilized religion, most of them were mothers and had  
20  
21 only a school degree (66% for both). Also, almost all of them were unemployed. Given that  
22  
23 religious coping does not involve scheduling appointments, planning treatments, and paying for  
24  
25 treatments, caregivers in this study might find it a suitable and comfortable way to overcome  
26  
27 stress. In addition, caregivers in this study might feel thankful for their children's survival and  
28  
29 continued their spiritual practices seeking help for residual health problems. It is important to  
30  
31 mention here that religious coping, even if it involves engaging in spiritual activities, does not  
32  
33 solve the actual stressor and its consequences. Therefore, there is contradicting evidence about  
34  
35 the effect of engaging in religious coping on individuals' health and quality of life.[35,36]  
36  
37  
38  
39

40 While not as frequent as religion, caregivers in this study also engaged in acceptance and  
41  
42 planning coping. Considering that this study was after cancer survival, and a significant amount  
43  
44 of time was spent dealing with cancer, utilizing acceptance coping might seem typical for this  
45  
46 population. Acceptance is showed as a common way of coping in individuals with terminal  
47  
48 illness, and can improve individuals' quality of life.[37] Acceptance is also viewed as the step  
49  
50 after denial,[38] and before searching for treatment options, and solving any related stressors.  
51  
52 However, when individuals engage in acceptance coping, they are not actively solving their  
53  
54  
55  
56  
57  
58  
59  
60



1  
2  
3 1 problem.[39] Therefore, it might be considered as a passive way of coping and should be utilized  
4  
5 2 with more active ways like planning and active coping. Caregivers also utilized planning, but this  
6  
7 3 study did not investigate if planning complemented acceptance coping. It is worth studying in the  
8  
9 4 future what coping strategies do caregiver combine to form their coping profile.

10  
11  
12 5 The least utilized coping strategies by caregivers in this study were humor and behavioral  
13  
14 6 dis-engagement. In looking at the definition of humor as making jokes or fun of the situation,  
15  
16 7 and the definition of behavioral dis-engagement as giving up coping, it is obvious that these  
17  
18 8 coping mechanisms might be more relevant to early stages of the cancer experience. After  
19  
20 9 battling a significant and serious disease with their beloved children, caregivers may turn into  
21  
22 10 more mature and strong individuals for their children and families. Therefore, caregivers in this  
23  
24 11 study might not find it appropriate to engage in humor, nor withdraw from their children's  
25  
26 12 condition. Instead, caregivers in this study were clients in the health and wellness clinic after  
27  
28 13 cancer and continued to be part of the condition with their children. In some research, humor and  
29  
30 14 behavioral dis-engagement along with substance use were considered as maladaptive and  
31  
32 15 dysfunctional ways of managing stressors.[40,41] In other studies, humor was viewed as a  
33  
34 16 comforting and relaxing mechanism that promotes caregivers' health.[42,43] It is worth further  
35  
36 17 investigating if promoting the use of humor in caregivers of children who have survived cancer  
37  
38 18 can alleviate caregivers' psychosocial health and improve the quality of life of caregivers and  
39  
40 19 their families.

41  
42  
43  
44  
45  
46  
47 20 This study found that having a girl child cancer survivor predicted caregivers' utilization  
48  
49 21 of more self-distraction as a coping strategy. Caregivers' active engagement in activities other  
50  
51 22 than thinking about current health problems of their girls might be a mechanism to forget the  
52  
53 23 problem and its consequences. There is a strong cultural belief in the Arab world that girls' role

## CAREGIVER COPING AFTER PEDIATRIC CANCER

15

1  
2  
3 1 in the community comes from their ability to form families, and born and raise children.[44]  
4  
5 2 Caregivers in this study who were mostly mothers, might engage in self-distraction in a medium  
6  
7 3 amount to stop thinking about their daughters' abilities to be future wives and mothers. The  
8  
9 4  
10 4 invasive treatments and their side effects might impose many physical disabilities, and change  
11  
12 5  
13 5 body appearance and function.

14  
15 6 Although correlation analyses yielded low to medium associations, these were worth  
16  
17 7 mentioning and discuss to contribute to the limited evidence in this area. Having the lowest level  
18  
19 8  
20 8 of education (elementary) was associated with utilizing more self-blame and self-distraction,  
21  
22 9  
23 9 while having the highest level of education (graduate) was associated with utilizing more  
24  
25 10  
26 10 instrumental support. Having higher forms of education might help caregivers to move from  
27  
28 11  
29 11 passive to active ways of coping. Instrumental use of support, which is utilizing help and advice  
30  
31 12  
32 12 from other people that might be professionals in supporting caregivers, was minimally studies in  
33  
34 13  
35 13 the literature. One study showed that emotional social support seeking predicted better individual  
36  
37 14  
38 14 and family psychosocial functioning while instrumental social support seeking did not.[45]

39  
40 15 In another association, having current medical and/or educational problems was  
41  
42 16  
43 16 associated with more substance use. While substance use was not a frequent coping mechanism  
44  
45 17  
46 17 by caregivers in this study, almost half of the caregivers responded "2 = I've been doing this a  
47  
48 18  
49 18 little bit" to one of the two items that for the substance use sub-scale. These two items involve  
50  
51 19  
52 19 utilizing alcohol and/or drugs to overcome problems. Substance use affects the health and quality  
53  
54 20  
55 20 of life of individuals and their families.[46] Almost half the caregivers, who had some degree of  
56  
57 21  
58 21 engagement in substance use in this study, had between 3-5 children, and almost half of them  
59  
60 22  
61 22 had a relatively low family income. These results suggested the need to promote caregivers'

1  
2  
3 1 limited time and financial resources toward solving their families' medical and educational  
4  
5 2 needs.

6  
7  
8 3 In summary, caregivers of children who have survived cancer in this study utilized  
9  
10 4 mostly religion coping. This study didn't investigate the reasons why caregivers didn't  
11  
12 5 frequently use other ways of coping that are defined in the literature as problem-focused like  
13  
14 6 active coping, or that involve other professionals or family members like use of emotional and  
15  
16 7 instrumental support coping. Given that coping is a highly individualized process, there might be  
17  
18 8 factors, like the cultural and social contexts, that characterize this process and are still under-  
19  
20 9 investigated. Further investigation of potential factors that affect caregiver coping will inform  
21  
22 10 care-providers on how to support caregivers' utilization of adaptive and active ways of coping  
23  
24 11 that promote caregivers' and families' health and well-being.

## 25 26 27 28 12 **Strengths and Limitations**

29  
30  
31 13 This study was novel in investigating coping of caregivers of children who have survived  
32  
33 14 cancer in Jordan. While the study utilized a convenient sample of caregivers from KHCC, this  
34  
35 15 later setting is the primary cancer center in Jordan and serves clients from different Jordanian  
36  
37 16 cities. The utilization of the Brief COPE was helpful in investigating a wide variety of  
38  
39 17 caregivers' coping styles. While this study performed the forward and backward translation of  
40  
41 18 the Brief COPE into Arabic, and a committee discussed the words and phrases in both languages  
42  
43 19 before agreeing on the final Arabic version, it did not investigate the psychometric properties of  
44  
45 20 the Arabic Brief COPE. There were missing data related caregivers and child demographics (as  
46  
47 21 reported in the tables), especially those related to age, and therefore, were not included in the  
48  
49 22 analyses. Finally, this cross-sectional study did not investigate whether caregivers' utilization of  
50  
51  
52  
53  
54  
55  
56  
57  
58  
59  
60

1  
2  
3 1 different coping strategies change from the diagnosis, during treatment, and after surviving  
4  
5 2 cancer.  
6  
7

### 8 **Conclusions**

9  
10 4 Caregivers of children who have survived cancer in Jordan utilized mostly passive coping  
11  
12 5 strategies like religious coping and acceptance. Also, having a girl cancer survivor predicted  
13  
14 6 caregivers' utilization of more self-distraction coping. Psychosocial interventions to support  
15  
16 7 caregivers' utilization of active coping strategies like active coping, and use of emotional and  
17  
18 8 instrumental support is important to promote caregivers' and families' psychosocial health and  
19  
20 9 quality of life.  
21  
22  
23  
24  
25  
26  
27  
28  
29  
30  
31  
32  
33  
34  
35  
36  
37  
38  
39  
40  
41  
42  
43  
44  
45  
46  
47  
48  
49  
50  
51  
52  
53  
54  
55  
56  
57  
58  
59  
60

**References**

- 1 Viale PH. The American Cancer Society's facts & figures: 2020 edition. *J Adv Pract Oncol* 2020 Mar;11(2):135.
- 2 Song JI, Shin DW, Choi JY et al. Quality of life and mental health in family caregivers of patients with terminal cancer. *Support Care Cancer* 2011 Oct;19:1519-26.
- 3 Ness KK, Hudson MM, Ginsberg JP et al. Physical performance limitations in the Childhood Cancer Survivor Study cohort. *J Clin Oncol* 2009 May 5;27(14):2382.
- 4 Bonner MJ, Hardy KK, Willard VW et al. Additional evidence of a nonverbal learning disability in survivors of pediatric brain tumors. *Children's Health Care* 2009 Jan 22;38(1):49-63.
- 5 Li HW, Lopez V, Chung OJ et al. The impact of cancer on the physical, psychological and social well-being of childhood cancer survivors. *Eur J Oncol Nurs* 2013 Apr 1;17(2):214-9.
- 6 Gage-Bouchard EA, Devine KA, Heckler CE. The relationship between socio-demographic characteristics, family environment, and caregiver coping in families of children with cancer. *J Clin Psychol Med Settings* 2013 Dec;20:478-87.
- 7 Kohlsdorf M, Costa Junior ÁL. Coping strategies and caregiver's anxiety in pediatric oncohematology. *Psicologia: Reflexão e Crítica* 2011;24:272-80.
- 8 Pinqart M. Parenting stress in caregivers of children with chronic physical condition—A meta-analysis. *Stress Health* 2018 Apr;34(2):197-207.
- 9 Litzelman K, Kent EE, Rowland JH. Interrelationships between health behaviors and coping strategies among informal caregivers of cancer survivors. *Health Educ Behav* 2018 Feb;45(1):90-100.

## CAREGIVER COPING AFTER PEDIATRIC CANCER

19

- 1  
2  
3 10 Vrettos I, Kamposioras K, Kontodimopoulos N et al. Comparing health-related quality of life  
4  
5 of cancer patients under chemotherapy and of their caregivers. *ScientificWorldJournal*  
6 2  
7 2012 Jan 1;2012.  
8 3  
9  
10 11 Üzar-Özçetin YS, Dursun Sİ. Quality of life, caregiver burden, and resilience among the  
11 4  
12 family caregivers of cancer survivors. *Eur J Oncol Nurs* 2020 Oct 1;48:101832.  
13 5  
14 12 Fladeboe K, King K, Kawamura J et al. Featured article: caregiver perceptions of stress and  
15 6  
16 sibling conflict during pediatric cancer treatment. *J Pediatr Psychol* 2018 Jul  
17 7  
18 1;43(6):588-98.  
19 8  
20  
21 13 Pierce L, Hocking MC, Schwartz LA et al. Caregiver distress and patient health-related  
22 9  
23 quality of life: psychosocial screening during pediatric cancer treatment. *Psychooncology*  
24 10  
25 2017 Oct;26(10):1555-61.  
26 11  
27  
28 14 Biggs A, Brough P, Drummond S. Lazarus and Folkman's psychological stress and coping  
29 12  
30 theory. *The handbook of stress and health: A guide to research and practice*. 2017 Apr  
31 13  
32 19:349-64.  
33 14  
34  
35 15 Kirby LD, Qian W, Adiguzel Z et al. Appraisal and coping predict health and well-being  
36 15  
37 during the COVID-19 pandemic: An international approach. *Int J Psycho* 2022  
38 16  
39 Feb;57(1):49-62.  
40 17  
41  
42 16 Carver CS, Connor-Smith J. Personality and coping. *Annu Rev Psychol* 2010 Jan 10;61:679-  
43 18  
44 704.  
45 19  
46  
47 17 Carver CS, Scheier MF, Weintraub JK. Assessing coping strategies: a theoretically based  
48 20  
49 approach. *J Pers Soc Psychol* 1989 Feb;56(2):267.  
50 21  
51  
52 18 Lazarus RS, Folkman S. *Stress, appraisal, and coping*. Springer publishing company; 1984  
53 22  
54 Mar 15.  
55 23  
56  
57  
58  
59  
60

## CAREGIVER COPING AFTER PEDIATRIC CANCER

20

- 1  
2  
3 1 19 O'Brien CW, Moorey S. Outlook and adaptation in advanced cancer: a systematic review.  
4  
5 2 *Psychooncology* 2010 Dec;19(12):1239-49.  
6  
7  
8 3 20 Mayordomo T, Viguer P, Sales A et al. Resilience and coping as predictors of well-being in  
9  
10 4 adults. *Mental Health and Psychopathology* 2021 Dec 26:265-277. Routledge.  
11  
12 5 21 Knowles SR, Apputhurai P, O'Brien CL et al. Exploring the relationships between illness  
13  
14 6 perceptions, self-efficacy, coping strategies, psychological distress and quality of life in a  
15  
16 7 cohort of adults with diabetes mellitus. *Psychol Health Med* 2020 Feb 7;25(2):214-28.  
17  
18  
19 8 22 Greer TM. Measuring coping strategies among African Americans: An exploration of the  
20  
21 9 latent structure of the COPE inventory. *Journal of Black Psychology* 2007  
22  
23 10 Aug;33(3):260-77.  
24  
25  
26 11 23 Hagan TL, Fishbein JN, Nipp RD et al. Coping in patients with incurable lung and  
27  
28 12 gastrointestinal cancers: a validation study of the brief COPE. *J Pain Symptom Manage*  
29  
30 13 2017 Jan 1;53(1):131-8.  
31  
32  
33 14 24 Nunes C, Pérez-Padilla J, Martins C et al. The brief COPE: Measurement invariance and  
34  
35 15 psychometric properties among community and at-risk Portuguese parents. *Int J Environ*  
36  
37 16 *Res Public Health* 2021 Mar 10;18(6):2806.  
38  
39  
40 17 25 World Health Organization. Process of translation and adaptation of instruments. Geneva:  
41  
42 18 WHO; 2016 [cited 2021 Oct 1]. Available from:  
43  
44 19 <https://www.scirp.org/reference/referencespapers?referenceid=3514337>  
45  
46  
47 20 26 IBM Corp. Released 2015. IBM SPSS Statistics for Windows, Version 23.0. Armonk, NY:  
48  
49 21 IBM Corp.  
50  
51  
52  
53  
54  
55  
56  
57  
58  
59  
60

- 1  
2  
3 1 27 Ismael N, Lawson LM, Moqbel M et al. Coping strategies among caregivers of children with  
4  
5 2 autism spectrum disorders: A cluster analysis. *International Journal of Medical and*  
6  
7 3 *Health Sciences* 2018;7(3).  
8  
9  
10 4 28 Akoglu H. User's guide to correlation coefficients. *Turkish journal of emergency medicine*  
11  
12 5 2018 Sep 1;18(3):91-3.  
13  
14  
15 6 29 Lee JW, Cho B. Prognostic factors and treatment of pediatric acute lymphoblastic leukemia.  
16  
17 7 *Korean journal of pediatrics* 2017 May;60(5):129.  
18  
19 8 30 Rafferty KA. " Everything remains uncertain": Theorizing parents' communication about  
20  
21 9 uncertainty, hope, and hopelessness while managing complex pediatric chronic  
22  
23 10 conditions (Doctoral dissertation, The University of Wisconsin-Milwaukee).  
24  
25  
26 11 31 Lagman RA, Yoo GJ, Levine EG et al. "Leaving it to God" religion and spirituality among  
27  
28 12 Filipina immigrant breast cancer survivors. *J Relig Health* 2014 Apr;53:449-60.  
29  
30  
31 13 32 Ahmadi F, Mohamed Hussin NA, Mohammad MT. Religion, culture and meaning-making  
32  
33 14 coping: A study among cancer patients in Malaysia. *J Relig Health* 2019 Dec;58:1909-  
34  
35 15 24.  
36  
37  
38 16 33 Elsheshtawy EA, Abo-Elez WF, Ashour HS et al. Coping strategies in Egyptian ladies with  
39  
40 17 breast cancer. *Breast cancer: basic and clinical research* 2014 Jan;8:BCBCR-S14755.  
41  
42  
43 18 34 Thuné-Boyle IC, Stygall J, Keshtgar MR, Davidson TI, Newman SP. Religious coping  
44  
45 19 strategies in patients diagnosed with breast cancer in the UK. *Psychooncology* 2011  
46  
47 20 Jul;20(7):771-82.  
48  
49 21 35 Haghghi F. Correlation between religious coping and depression in cancer patients. *Psychiatr*  
50  
51 22 *Danub* 2013 Sep 17;25(3):0-240.  
52  
53  
54  
55  
56  
57  
58  
59  
60



## CAREGIVER COPING AFTER PEDIATRIC CANCER

22

- 1  
2  
3 1 36 Ng GC, Mohamed S, Sulaiman AH et al. Anxiety and depression in cancer patients: the  
4  
5 2 association with religiosity and religious coping. *J Relig Health* 2017 Apr;56:575-90.  
6  
7  
8 3 37 Nipp RD, El-Jawahri A, Fishbein JN et al. The relationship between coping strategies, quality  
9  
10 4 of life, and mood in patients with incurable cancer. *Cancer* 2016 Jul 1;122(13):2110-6.  
11  
12 5 38 Kübler-Ross E, Kessler D. The five stages of grief. In Library of Congress Catalog in  
13  
14 6 Publication Data (Ed.), On grief and grieving 2009:7-30.  
15  
16  
17 7 39 Norberg AL, Lindblad F, Boman KK. Coping strategies in parents of children with cancer.  
18  
19 8 *Soc Sci Med* 2005 Mar 1;60(5):965-75.  
20  
21 9 40 Costas-Muñiz R. Hispanic adolescents coping with parental cancer. *Support Care Cancer*  
22  
23 10 2012 Feb;20:413-7.  
24  
25  
26 11 41 Parekh NK, Shah S, McMaster K et al. Effects of caregiver burden on quality of life and  
27  
28 12 coping strategies utilized by caregivers of adult patients with inflammatory bowel  
29  
30 13 disease. *Annals of Gastroenterology: Quarterly Publication of the Hellenic Society of*  
31  
32 14 *Gastroenterology* 2017;30(1):89.  
33  
34  
35 15 42 Christie W, Moore C. The impact of humor on patients with cancer. *Clin J Oncol Nurs* 2005  
36  
37 16 Apr 1;9(2):211.  
38  
39  
40 17 43 Tan T, Schneider MA. Humor as a coping strategy for adult-child caregivers of individuals  
41  
42 18 with Alzheimer's disease. *Geriatr Nurs* 2009 Nov 1;30(6):397-408.  
43  
44  
45 19 44 Douki S, Zineb SB, Nacef F et al. Women's mental health in the Muslim world: Cultural,  
46  
47 20 religious, and social issues. *J Affect Disord* 2007 Sep 1;102(1-3):177-89.  
48  
49  
50 21 45 Hill EM. Quality of life and mental health among women with ovarian cancer: examining the  
51  
52 22 role of emotional and instrumental social support seeking. *Psychol Health Med* 2016 Jul  
53  
54 23 3;21(5):551-61.  
55  
56  
57  
58  
59  
60

## CAREGIVER COPING AFTER PEDIATRIC CANCER

23

1  
2  
3 1 46 Belizaire LS, Fuertes JN. Attachment, coping, acculturative stress, and quality of life among  
4  
5 2  
6 Haitian immigrants. *J Couns Dev* 2011 Jan;89(1):89-97.  
7  
8 3  
9 4  
10 5  
11 6  
12 7  
13 8  
14 9  
15 10  
16 11  
17 12  
18 13  
19 14  
20 15  
21 16  
22 17  
23 18  
24 19  
25 20  
26 21  
27 22  
28 23  
29 24  
30 25  
31 26  
32 27  
33 28  
34 29  
35 30  
36 31  
37 32  
38 33  
39 34  
40 35  
41 36  
42 37  
43 38  
44 39  
45 40  
46 41  
47 42  
48 43  
49 44  
50  
51  
52  
53  
54  
55  
56  
57  
58  
59  
60

Confidential: For Review Only

## CAREGIVER COPING AFTER PEDIATRIC CANCER

24

**1 Table 1**  
**2 Demographic Characteristics of Caregivers and Children N= 102**

| Caregiver Demographics |                      |           |                      | Child Demographics   |           |  |
|------------------------|----------------------|-----------|----------------------|----------------------|-----------|--|
| Relationship to child  | Mother               | 65(63.7%) | Child gender         | Male                 | 53(52%)   |  |
|                        | Father               | 31(30.4%) |                      | Female               | 45(44.1%) |  |
|                        | Others               | 4(3.9%)   |                      | Prefer not to report | 4(3.9%)   |  |
|                        | Prefer not to report | 2(2%)     |                      |                      |           |  |
| Social status          | Married              | 85(83.3%) | Child School Grade   | Elementary           | 35(34.3%) |  |
|                        | Divorced             | 1(1%)     |                      | Middle               | 35(34.3%) |  |
|                        | Other                | 14(13.7)  |                      | High                 | 16(15.7%) |  |
|                        | Prefer not to report | 2(2%)     | Number of Siblings   | <3                   | 28(27.5%) |  |
| Educational status     | Elementary           | 22(21.6%) |                      | 3-5                  | 61(59.8%) |  |
|                        |                      |           |                      | >5                   | 12(11.8%) |  |
|                        |                      |           | Order of child       | 1st                  | 23(22.5%) |  |
|                        |                      |           |                      | 2nd                  | 28(27.5%) |  |
|                        |                      |           |                      | 3rd                  | 21(20.6%) |  |
| 4rth-7th               | 29(28.4%)            |           |                      |                      |           |  |
| Prefer not to report   | 1                    |           |                      |                      |           |  |
| Employment status      | Full-time            | 30(29.4%) | Total family members | <5                   | 12(11.8%) |  |
|                        |                      |           |                      | >5                   | 86(84.3%) |  |
|                        |                      |           |                      | Part-time            | 9(8.8%)   |  |
|                        |                      |           |                      | Un-employed          | 50(49%)   |  |
| Prefer not to report   | 13(12.7%)            |           | Prefer not to report | 4(3.9%)              |           |  |
| Monthly income         | <500                 | 62(60.8%) | Residence type       | House                | 30(29.4%) |  |
|                        |                      |           |                      | 500-1000             | 27(26.5%) |  |
|                        |                      |           |                      | Apartment            | 71(69.6%) |  |
|                        |                      |           |                      | >1000                | 5(4.9%)   |  |
| Prefer not to report   | 6(5.9%)              |           | Prefer not to report | 1(1%)                |           |  |

4 Notes: N= Total sample number, n (%)= Number and percent of participants

5  
6  
7  
8  
9  
10  
11

CAREGIVER COPING AFTER PEDIATRIC CANCER

**Table 2**  
*Condition-Related Characteristics of Children N= 102*

|                        |                       |           |
|------------------------|-----------------------|-----------|
| Cancer diagnosis n (%) | Acute leukemia        | 44(43.1%) |
|                        | Rhabdomyosarcoma      | 15(14.7%) |
|                        | Bone tumors           | 11(10.8%) |
|                        | Wilms                 | 9(8.8%)   |
|                        | Lymphoma              | 5(4.9%)   |
|                        | Neuroblastoma         | 2(2%)     |
|                        | Germ-cell tumors      | 2(2%)     |
|                        | Brain tumors          | 1(1%)     |
|                        | Nasopharyngeal cancer | 1(1%)     |
|                        | Optic pathway glioma  | 1(1%)     |
|                        | Prefer not to report  | 11(10.8%) |

Notes: N= Total sample number, n (%)= Number and percent of participants

Confidential: For Review Only

## CAREGIVER COPING AFTER PEDIATRIC CANCER

26

**Table 3**  
 Descriptive Statistics of the Brief COPE Sub-Scale Scores N= 102

| Brief COPE Subscales        | Mean | Median | Range | Min  | Max  |
|-----------------------------|------|--------|-------|------|------|
| Religion                    | 6.42 | 7.00   | 6.00  | 2.00 | 8.00 |
| Acceptance                  | 5.95 | 6.00   | 6.00  | 2.00 | 8.00 |
| Planning                    | 5.10 | 5.00   | 6.00  | 2.00 | 8.00 |
| Active Coping               | 5.01 | 5.00   | 6.00  | 2.00 | 8.00 |
| Positive Re-framing         | 4.96 | 5.00   | 6.00  | 2.00 | 8.00 |
| Use of Emotional Support    | 4.89 | 5.00   | 6.00  | 2.00 | 8.00 |
| Use of Instrumental Support | 4.83 | 5.00   | 6.00  | 2.00 | 8.00 |
| Venting                     | 4.30 | 4.00   | 6.00  | 2.00 | 8.00 |
| Self-Distraction            | 4.10 | 4.00   | 6.00  | 2.00 | 8.00 |
| Denial                      | 3.69 | 3.00   | 6.00  | 2.00 | 8.00 |
| Self-Blame                  | 3.52 | 3.00   | 6.00  | 2.00 | 8.00 |
| Substance Use               | 3.11 | 2.00   | 6.00  | 2.00 | 8.00 |
| Behavioral Dis-engagement   | 3.09 | 2.00   | 5.00  | 2.00 | 7.00 |
| Humor                       | 2.98 | 2.00   | 5.00  | 2.00 | 7.00 |

Notes: N= Total sample size, Min= Minimum subscale score, Max= Maximum subscale score

## CAREGIVER COPING AFTER PEDIATRIC CANCER

27

**Table 4**  
*Correlations between Caregiver Characteristics and Coping Strategies*

|                             | Relationship to Child | Educational Level | Employment Status | Child Gender | Current Health Problems | Child order | Number of Siblings |
|-----------------------------|-----------------------|-------------------|-------------------|--------------|-------------------------|-------------|--------------------|
| Self-Distracted             |                       | -.273**           | .216*             | .297**       |                         |             |                    |
| Substance Use               |                       | .006              | .042              | .003         | .255*                   |             |                    |
| Use of Emotional Support    |                       |                   |                   | .201*        | .011                    |             |                    |
| Use of Instrumental Support |                       | -.268**           |                   | .211*        |                         | -.226*      |                    |
| Venting                     | -.213*                | .007              |                   |              |                         |             | -.203*             |
| Self-Blame                  | -.236*                | -.217*            |                   |              |                         |             | .042               |
|                             | .034                  | .031              |                   |              |                         |             |                    |

Notes: \* indicates  $p < .05$ , \*\* indicates  $p < .01$

1  
2  
3 **Figure 1 Legend**

4 *Caregivers' utilization of different coping strategies. Responses 1= Never and 4= Always were*  
5 *used in this figure. Religion and acceptance coping were mostly utilized by caregivers of*  
6 *children who have survived pediatric cancer, while humor and behavioral disengagement were*  
7 *the least utilized coping strategies.*  
8  
9  
10  
11  
12  
13  
14  
15  
16  
17  
18  
19  
20  
21  
22  
23  
24  
25  
26  
27  
28  
29  
30  
31  
32  
33  
34  
35  
36  
37  
38  
39  
40  
41  
42  
43  
44  
45  
46  
47  
48  
49  
50  
51  
52  
53  
54  
55  
56  
57  
58  
59  
60

Confidential: For Review Only

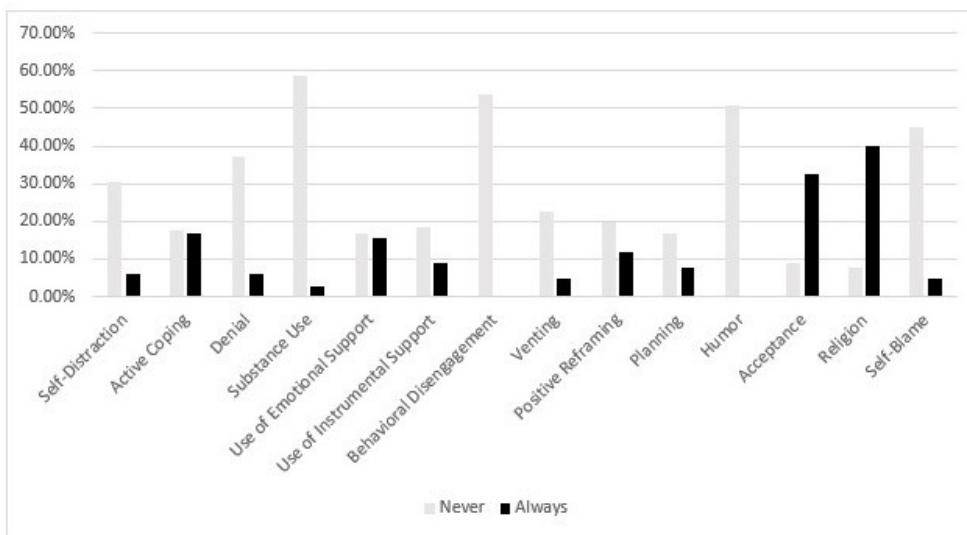

Figure 1 Legend

Caregivers' utilization of different coping strategies. Responses 1= Never and 4= Always were used in this figure. Religion and acceptance coping were mostly utilized by caregivers of children who have survived pediatric cancer, while humor and behavioral disengagement were the least utilized coping strategies.

169x94mm (96 x 96 DPI)
