# Supplementary material for: Exploring coping strategies among caregivers of children who have survived paediatric cancer in Jordan
Source: PubMed Central journal article supplement — BMJ Paediatr Open. 2024 Apr 11;8(1):e002453. doi: 10.1136/bmjpo-2023-002453 (PMC11015291; doi:10.1136/bmjpo-2023-002453), 2024-04-11
Supplement: bmjpo-2023-002453.reviewer_comments.pdf [file bmjpo-2023-002453.reviewer_comments.pdf]

## PEER REVIEW HISTORY

BMJ Paediatrics Open publishes all reviews undertaken for accepted manuscripts. Reviewers are asked to complete a checklist review form and are provided with free text boxes to elaborate on their assessment. These free text comments are reproduced below.

### ARTICLE DETAILS

|                            |                                                                                                       |
|----------------------------|-------------------------------------------------------------------------------------------------------|
| <b>TITLE (PROVISIONAL)</b> | Exploring Coping Strategies among Caregivers of Children who have Survived Pediatric Cancer in Jordan |
| <b>AUTHORS</b>             | Ismael, Noor<br>Jaber, Ala'a<br>Malkawi, Somaya<br>Al Awady, Sherin<br>Ismael, Taleb                  |

### VERSION 1 – REVIEW

|                        |                                                               |
|------------------------|---------------------------------------------------------------|
| <b>REVIEWER</b>        | Dr. Alaa Oteir<br>Jordan University of Science and Technology |
| <b>REVIEW RETURNED</b> | 27-Jan-2024                                                   |

|                         |                                                                                                                                                                                                                                                                                                                                                                                                                                                                                                                                                                                                                                                                                                                                                                                                                                                                                                                                                                                                                                                                          |
|-------------------------|--------------------------------------------------------------------------------------------------------------------------------------------------------------------------------------------------------------------------------------------------------------------------------------------------------------------------------------------------------------------------------------------------------------------------------------------------------------------------------------------------------------------------------------------------------------------------------------------------------------------------------------------------------------------------------------------------------------------------------------------------------------------------------------------------------------------------------------------------------------------------------------------------------------------------------------------------------------------------------------------------------------------------------------------------------------------------|
| <b>GENERAL COMMENTS</b> | <p>Dear editor,<br/>Thanks for inviting me to review the paper "8 Exploring Coping Strategies among Caregivers of Children who have Survived Pediatric cancer in Jordan". The research is novel and very important, and the manuscript is well written. However, there are a few comments to further improve the manuscript. The comments are found below:</p> <p>Abstract<br/>-Please use the word "mean" rather than M</p> <p>Introduction:<br/>- I would end the introduction with an aim statement.</p> <p>Methods:<br/>- please move the second paragraph of "participants" to the results section (page 9, lines 36-40)<br/>- I would remove " and studied PhD in the United States"<br/>- please mention the regression analysis in the abstract.</p> <p>Results:<br/>- to give more clarity of the readers, I suggest the authors add the direction of the correlations, whether it is negatively of positively correlated.</p> <p>Discussion<br/>- I suggest the reviewers add a brief summary of the correlations in the first paragraph of the discussion</p> |
|-------------------------|--------------------------------------------------------------------------------------------------------------------------------------------------------------------------------------------------------------------------------------------------------------------------------------------------------------------------------------------------------------------------------------------------------------------------------------------------------------------------------------------------------------------------------------------------------------------------------------------------------------------------------------------------------------------------------------------------------------------------------------------------------------------------------------------------------------------------------------------------------------------------------------------------------------------------------------------------------------------------------------------------------------------------------------------------------------------------|

|                        |                                            |
|------------------------|--------------------------------------------|
| <b>REVIEWER</b>        | Saad Al Nassan<br>The Hashemite University |
| <b>REVIEW RETURNED</b> | 28-Jan-2024                                |

|                         |                                                                                                                                                                                                                                                             |
|-------------------------|-------------------------------------------------------------------------------------------------------------------------------------------------------------------------------------------------------------------------------------------------------------|
| <b>GENERAL COMMENTS</b> | Thank you for inviting me to review this work. I enjoyed reading this manuscript which investigates the coping strategies among caregivers of children who have survived pediatric cancer in Jordan. However, below you will find few minor comments to the |
|-------------------------|-------------------------------------------------------------------------------------------------------------------------------------------------------------------------------------------------------------------------------------------------------------|

|  |                                                                                                                                                                                                                                                                                                                                                                                                                                                                                                                                                                                                                                                                                                                                                                                                                                                                                                                                                                                                                                                            |
|--|------------------------------------------------------------------------------------------------------------------------------------------------------------------------------------------------------------------------------------------------------------------------------------------------------------------------------------------------------------------------------------------------------------------------------------------------------------------------------------------------------------------------------------------------------------------------------------------------------------------------------------------------------------------------------------------------------------------------------------------------------------------------------------------------------------------------------------------------------------------------------------------------------------------------------------------------------------------------------------------------------------------------------------------------------------|
|  | <p>authors, hopefully they will find it useful to include in their manuscript:</p> <p>1- By having caregivers among the participants who weren't parents of the survived children, how did that impact the results of coping strategies? Was this factor considered to have any impact on the type of coping by not being a direct parent of a cancer surviving child? Authors did not discuss such point.</p> <p>2- Did authors test if other demographic variables such as social status, employment status, or monthly income had any impact on the coping strategies?</p> <p>3- In the literature review section (page 5, line 6): "pediatric cancer remains understood". Did authors mean "poorly understood"?</p> <p>4- I suggest moving the second paragraph of the participants and settings section (Page 6, lines 11-17) into the results section.</p> <p>5- Results section (page 10 line 8): "A number caregiver". Please add "of"</p> <p>6- Discussion section (page 14, line 20): Please correct "frequently used" into "frequently use"</p> |
|--|------------------------------------------------------------------------------------------------------------------------------------------------------------------------------------------------------------------------------------------------------------------------------------------------------------------------------------------------------------------------------------------------------------------------------------------------------------------------------------------------------------------------------------------------------------------------------------------------------------------------------------------------------------------------------------------------------------------------------------------------------------------------------------------------------------------------------------------------------------------------------------------------------------------------------------------------------------------------------------------------------------------------------------------------------------|

### VERSION 1 – AUTHOR RESPONSE

Reviewers' Comments to the Authors:

Reviewer 1 Dr. Alaa Oteir, Jordan University of Science and Technology

"The research is novel and very important, and the manuscript is well written."

Author response: Thank you.

1. Comment from Reviewer 1 noting use the word "mean" rather than M in the Abstract

Author response: Thank you for pointing this out. We have changed the abbreviation "M" to the word "mean" in the Abstract section in the revised main document. Changes are highlighted in yellow in page 3.

2. Comment from Reviewer 1 suggesting ending the introduction section with an aim statement.

Author response: As suggested by the reviewer, we have added the aim of the study at the end of the introduction on page 7 lines 11,12. The addition is highlighted in yellow in the revised main document.

3. Comments from Reviewer 1 on the methods section suggesting removing the second paragraph of "participants" to the results section, removing " and studied PhD in the United States" from tool translation, and mention the regression analysis in the abstract.

Author response: As suggested by the reviewer, we have moved the second paragraph of "participants" to the results section on page 11 lines 4- 13 (highlighted in yellow in the revised main document). We have also removed the statement "and studied PhD in the United States" from the methods section page 9 lines 7-9, and added information about the regression analysis in the Abstract page 3 line 7 (highlighted in yellow in the revised main document).

4. Comment from Reviewer 1 suggesting adding add the direction of the correlations in the results section, whether it is negatively of positively correlated.

Author response: As suggested by the reviewer, we have added the direction of the correlations in the results section. Changes are highlighted in yellow in the revised main document pages 11 and 12.

5. Comment from Reviewer 1 suggesting adding a brief summary of the correlations in the first paragraph of the discussion.

Author response: As suggested by the reviewer, we have added a brief summary of the correlations in the first paragraph of the discussion on page 12 lines 13- 15 (highlighted in yellow in the revised main document).

The added text reads as follows:

“Caregivers most frequently utilized religion coping, followed by acceptance and planning. The least utilized coping strategies were humor and behavioral dis-engagement as coping strategies.”

Reviewer 2 Dr. Saad Al Nassan, The Hashemite University

“Thank you for inviting me to review this work. I enjoyed reading this manuscript which investigates the coping strategies among caregivers of children who have survived pediatric cancer in Jordan.”

Author response: Thank you.

1. Comment from Reviewer 2 asking if we have considered the effect of being a caregiver who is not a parent on the coping strategies. Reviewer 2 suggested discussing this point.

Author response: In this study, we haven’t considered caregiver relationship to child as a factor in this study because correlational analyses did not yield significant relationships between caregiver relationship to the child and the coping strategies utilized. While around 66% reported their relationship to the child as mothers, and around 30% as fathers, only four caregivers reported other relationship to the child. Significant demographical correlates are presented in Table four. Child gender was the only factor that predicted utilizing one coping strategy (self-distraction).

2. Comment from Reviewer 2 asking if we have tested other demographic variables such as social status, employment status, or monthly income on the coping strategies?

Author response: Yes, we have included these demographic variables in our correlational analyses (significant correlates are presented in Table four). However, linear regression analysis presented only one significant predictor (female child gender predicted more caregiver use of self-distraction as a coping strategy). We have discussed this finding in the discussion section page 14 lines 20-23 and page 15 lines 1-5.

3. Comment from Reviewer 2 asking if the phrase “pediatric cancer remains understood” means “poorly understood.”

Author response: Yes, thank you so much for pointing this out. We have added “poorly” to the revised document page 6 line 20 highlighted in yellow.

4. I suggest moving the second paragraph of the participants and settings section (Page 6, lines 11-17) into the results section.

Author response: As suggested by reviewers 1 and 2, we have moved information about the participants to the results section on page 11 lines 4- 13 (highlighted in yellow in the revised main document).

5. Results section (page 10 line 8): "A number caregiver". Please add "of"

Author response: We have added “of” in the revised document page 11 line 19

6. Discussion section (page 14, line 20): Please correct "frequently used" into "frequently use"

Author response: We have corrected “frequently used” to “frequently use” in the revised document page 16 line 5.

## VERSION 2 – REVIEW

|          |                |
|----------|----------------|
| REVIEWER | Dr. Alaa Oteir |
|----------|----------------|

|                        |                                             |
|------------------------|---------------------------------------------|
|                        | Jordan University of Science and Technology |
| <b>REVIEW RETURNED</b> | 17-Mar-2024                                 |

|                         |                                                                                                                                                                                                                                                                                                                                                                     |
|-------------------------|---------------------------------------------------------------------------------------------------------------------------------------------------------------------------------------------------------------------------------------------------------------------------------------------------------------------------------------------------------------------|
| <b>GENERAL COMMENTS</b> | <p>Dear editor,<br/> Thank you for inviting me to review the revised manuscript<br/> "Exploring Coping Strategies among Caregivers of Children who<br/> have Survived Pediatric Cancer in Jorda.<br/> I would applaud the authors for their efforts. The authors have<br/> addressed all my previous comments, I have no further comments.<br/> Kindest regards</p> |
|-------------------------|---------------------------------------------------------------------------------------------------------------------------------------------------------------------------------------------------------------------------------------------------------------------------------------------------------------------------------------------------------------------|

|                        |                                            |
|------------------------|--------------------------------------------|
| <b>REVIEWER</b>        | Saad Al Nassan<br>The Hashemite University |
| <b>REVIEW RETURNED</b> | 20-Mar-2024                                |

|                         |                                                                                                               |
|-------------------------|---------------------------------------------------------------------------------------------------------------|
| <b>GENERAL COMMENTS</b> | Thank you for taking my comments and revisions into your concern. Wishing you all the best in future studies. |
|                         |                                                                                                               |

#### VERSION 2 – AUTHOR RESPONSE

None
